# Supplementary material
Source: publisher figshare collection journal article supplement (https://acs.figshare.com/ndownloader/files/13320941)
Supplement: Supplementary file 1 [file 13320941]

## Sheet: Amyg_Peptides
Table S3. Peptides identified from the amygdala extract using succinic anhydride labeling and not exhibiting a significant level change from exposure to a cocaine-associated context.
Protein Accession	Start	End	Peptide	Score (%)	-10lgP	Mass	ppm	m/z	z	RT	# Tags	Label/PTM
sp|P20357|MTAP2_MOUSE	1807	1826	L.L(+100.02)ESPQLATLAEDVTAALAK(+100.02)Q.G	99.9	87.38	2268.14	-7.9	1135.07	2	77.72	2	Succinic anhydride labeling reagent light
tr|Q3TLQ0|Q3TLQ0_MOUSE	477	496	L.L(+100.02)ESPQLATLAEDVTAALAK(+100.02)Q.G	99.9	87.38	2268.14	-7.9	1135.07	2	77.72	2	Succinic anhydride labeling reagent light
tr|Q80X35|Q80X35_MOUSE	445	464	L.L(+100.02)ESPQLATLAEDVTAALAK(+100.02)Q.G	99.9	87.38	2268.14	-7.9	1135.07	2	77.72	2	Succinic anhydride labeling reagent light
tr|Q80ZL4|Q80ZL4_MOUSE	446	465	L.L(+100.02)ESPQLATLAEDVTAALAK(+100.02)Q.G	99.9	87.38	2268.14	-7.9	1135.07	2	77.72	2	Succinic anhydride labeling reagent light
sp|Q61171|PRDX2_MOUSE	131	154	F.I(+100.02)IDAK(+100.02)GVLRQITVNDLPVGRSVDE.A	99.9	85.03	2806.47	-2.8	936.495	3	88.05	2	Succinic anhydride labeling reagent light
sp|P20357|MTAP2_MOUSE	1807	1826	L.L(+104.04)ESPQLATLAEDVTAALAK(+104.04)Q.G	99.9	77.77	2276.19	-7.1	1139.09	2	77.58	2	Succinic anhydride labeling reagent heavy (+4amu 4H2)
tr|Q3TLQ0|Q3TLQ0_MOUSE	477	496	L.L(+104.04)ESPQLATLAEDVTAALAK(+104.04)Q.G	99.9	77.77	2276.19	-7.1	1139.09	2	77.58	2	Succinic anhydride labeling reagent heavy (+4amu 4H2)
tr|Q80X35|Q80X35_MOUSE	445	464	L.L(+104.04)ESPQLATLAEDVTAALAK(+104.04)Q.G	99.9	77.77	2276.19	-7.1	1139.09	2	77.58	2	Succinic anhydride labeling reagent heavy (+4amu 4H2)
tr|Q80ZL4|Q80ZL4_MOUSE	446	465	L.L(+104.04)ESPQLATLAEDVTAALAK(+104.04)Q.G	99.9	77.77	2276.19	-7.1	1139.09	2	77.58	2	Succinic anhydride labeling reagent heavy (+4amu 4H2)
sp|Q64332|SYN2_MOUSE	26	79	D.L(+100.02)QRPEPQQPPPAPGPGAATASAATSAASPGPERRPPPAQAPAPQPAPQPAPTPS.V	99.9	71.89	5315.67	-6.7	1329.92	4	58.71	1	Succinic anhydride labeling reagent light
sp|P51881|ADT2_MOUSE	9	35	F.A(+100.02)K(+100.02)DFLAGGVAAAISK(+100.02)TAVAPIERVK(+100.02)LL.L	99.9	71.51	3108.66	-3.9	1037.22	3	98.39	4	Succinic anhydride labeling reagent light
sp|Q9CPQ1|COX6C_MOUSE	29	49	F.I(+100.02)VALGVAAAYK(+100.02)FGVAEPRK(+100.02)K(+100.02)A.Y	99.9	71.49	2558.33	-4.6	1280.16	2	99.76	4	Succinic anhydride labeling reagent light
sp|P08249|MDHM_MOUSE	224	258	L.A(+104.04)TLTGRIQEAGTEVVK(+104.04)AK(+104.04)AGAGSATLSMAYAGARF.V	99.9	71.44	3765.93	0.4	942.489	4	85.08	3	Succinic anhydride labeling reagent heavy (+4amu 4H2)
sp|P48962|ADT1_MOUSE	9	34	F.L(+104.04)K(+104.04)DFLAGGIAAAVSK(+104.04)TAVAPIERVK(+104.04)L.L	99.9	69.69	3053.72	-8.7	1018.91	3	77.1	4	Succinic anhydride labeling reagent heavy (+4amu 4H2)
tr|A8DUK4|A8DUK4_MOUSE	116	147	L.G(+100.02)HHLGK(+100.02)DFTPAAQAAFQK(+100.02)VVAGVAAALAHK(+100.02)YH	99.9	68.5	3710.81	-3.1	928.707	4	92.79	4	Succinic anhydride labeling reagent light
sp|P17742|PPIA_MOUSE	119	145	K.T(+100.02)EWLDGK(+100.02)HVVFGK(+100.02)VK(+100.02)EGMNIVEAMERF.G	99.9	68.28	3548.65	-5.6	1183.88	3	105.11	4	Succinic anhydride labeling reagent light
sp|Q61171|PRDX2_MOUSE	131	154	F.I(+104.04)IDAK(+104.04)GVLRQITVNDLPVGRSVDE.A	99.9	67.61	2814.52	-1.6	939.18	3	87.91	2	Succinic anhydride labeling reagent heavy (+4amu 4H2)
sp|P08249|MDHM_MOUSE	25	42	N.A(+104.04)K(+104.04)VAVLGASGGIGQPLSL.L	99.9	67.58	1845.03	-2.9	923.521	2	85.35	2	Succinic anhydride labeling reagent heavy (+4amu 4H2)
sp|P17742|PPIA_MOUSE	119	145	K.T(+104.04)EWLDGK(+104.04)HVVFGK(+104.04)VK(+104.04)EGMNIVEAMERF.G	99.9	67.57	3564.75	-7	1189.25	3	105.02	4	Succinic anhydride labeling reagent heavy (+4amu 4H2)
sp|Q64332|SYN2_MOUSE	186	205	L.I(+100.02)RQHAFGMAENEDFRHLVIG.M	99.9	64.06	2439.18	-8.8	610.796	4	69.97	1	Succinic anhydride labeling reagent light
sp|P48962|ADT1_MOUSE	12	31	D.F(+100.02)LAGGIAAAVSK(+100.02)TAVAPIER.V	99.9	62.85	2141.14	-3.8	1071.57	2	89.06	2	Succinic anhydride labeling reagent light
sp|P01942|HBA_MOUSE	107	123	L.L(+100.02)VTLASHHPADFTPAVH.A	99.9	62.63	1911.95	-8.9	638.318	3	69.69	1	Succinic anhydride labeling reagent light
tr|Q91VB8|Q91VB8_MOUSE	107	123	L.L(+100.02)VTLASHHPADFTPAVH.A	99.9	62.63	1911.95	-8.9	638.318	3	69.69	1	Succinic anhydride labeling reagent light
sp|P51881|ADT2_MOUSE	9	33	F.A(+104.04)K(+104.04)DFLAGGVAAAISK(+104.04)TAVAPIERVK(+104.04).L	99.9	62.59	2898.59	-14	967.191	3	67.33	4	Succinic anhydride labeling reagent heavy (+4amu 4H2)
sp|Q9CPQ1|COX6C_MOUSE	29	49	F.I(+104.04)VALGVAAAYK(+104.04)FGVAEPRK(+104.04)K(+104.04)A.Y	99.9	62.35	2574.43	-6.3	859.144	3	99.47	4	Succinic anhydride labeling reagent heavy (+4amu 4H2)
sp|P48962|ADT1_MOUSE	12	33	D.F(+104.04)LAGGIAAAVSK(+104.04)TAVAPIERVK(+104.04).L	99.9	62.31	2480.39	-13	827.794	3	66.78	3	Succinic anhydride labeling reagent heavy (+4amu 4H2)
sp|P14152|MDHC_MOUSE	286	307	L.Y(+100.02)SFPVVIK(+100.02)NK(+100.02)TWK(+100.02)FVEGLPIND.F	99.9	61.54	2993.46	-6	998.821	3	102.85	4	Succinic anhydride labeling reagent light
sp|Q64332|SYN2_MOUSE	85	115	F.F(+104.04)SSLSQAVK(+104.04)QTAASAGLVDAPAPSAASRK(+104.04)AK(+104.04).V	99.9	61.54	3430.78	-4.2	1144.6	3	86.68	4	Succinic anhydride labeling reagent heavy (+4amu 4H2)
sp|P51881|ADT2_MOUSE	9	33	F.A(+100.02)K(+100.02)DFLAGGVAAAISK(+100.02)TAVAPIERVK(+100.02).L	99.9	61.27	2882.49	-0.7	961.837	3	91.61	4	Succinic anhydride labeling reagent light
sp|P48962|ADT1_MOUSE	12	33	D.F(+100.02)LAGGIAAAVSK(+100.02)TAVAPIERVK(+100.02).L	99.9	60.51	2468.32	-1.9	1235.16	2	90.63	3	Succinic anhydride labeling reagent light
sp|P52480|KPYM_MOUSE	453	467	A.V(+100.02)TRNPQTARQAHLYR.G	99.9	60.42	1909.99	-10.8	478.499	4	49.37	1	Succinic anhydride labeling reagent light
sp|Q61548|AP180_MOUSE	80	93	L.V(+100.02)TTHHLMVHGNERF.I	99.9	60.32	1776.84	-9.6	445.212	4	55.54	1	Succinic anhydride labeling reagent light
tr|E9Q9A3|E9Q9A3_MOUSE	80	93	L.V(+100.02)TTHHLMVHGNERF.I	99.9	60.32	1776.84	-9.6	445.212	4	55.54	1	Succinic anhydride labeling reagent light
tr|E9QLK9|E9QLK9_MOUSE	80	93	L.V(+100.02)TTHHLMVHGNERF.I	99.9	60.32	1776.84	-9.6	445.212	4	55.54	1	Succinic anhydride labeling reagent light
tr|E9QQ05|E9QQ05_MOUSE	80	93	L.V(+100.02)TTHHLMVHGNERF.I	99.9	60.32	1776.84	-9.6	445.212	4	55.54	1	Succinic anhydride labeling reagent light
tr|Q3TWS4|Q3TWS4_MOUSE	80	93	L.V(+100.02)TTHHLMVHGNERF.I	99.9	60.32	1776.84	-9.6	445.212	4	55.54	1	Succinic anhydride labeling reagent light
tr|Q8BQA2|Q8BQA2_MOUSE	80	93	L.V(+100.02)TTHHLMVHGNERF.I	99.9	60.32	1776.84	-9.6	445.212	4	55.54	1	Succinic anhydride labeling reagent light
sp|P60710|ACTB_MOUSE	32	52	F.P(+100.02)SIVGRPRHQGVM(+15.99)VGM(+15.99)GQK(+100.02)DS.Y	99.9	60.11	2467.16	-9.3	823.386	3	54.95	2	Succinic anhydride labeling reagent light; Oxidation (M)
sp|P68033|ACTC_MOUSE	34	54	F.P(+100.02)SIVGRPRHQGVM(+15.99)VGM(+15.99)GQK(+100.02)DS.Y	99.9	60.11	2467.16	-9.3	823.386	3	54.95	2	Succinic anhydride labeling reagent light; Oxidation (M)
sp|P68134|ACTS_MOUSE	34	54	F.P(+100.02)SIVGRPRHQGVM(+15.99)VGM(+15.99)GQK(+100.02)DS.Y	99.9	60.11	2467.16	-9.3	823.386	3	54.95	2	Succinic anhydride labeling reagent light; Oxidation (M)
tr|E9Q5F4|E9Q5F4_MOUSE	32	52	F.P(+100.02)SIVGRPRHQGVM(+15.99)VGM(+15.99)GQK(+100.02)DS.Y	99.9	60.11	2467.16	-9.3	823.386	3	54.95	2	Succinic anhydride labeling reagent light; Oxidation (M)
sp|Q03265|ATPA_MOUSE	64	89	D.T(+100.02)SVDLEETGRVLSIGDGIARVHGLRN.V	99.9	59.88	2863.48	-6.8	716.872	4	73.15	1	Succinic anhydride labeling reagent light
tr|D3Z6F5|D3Z6F5_MOUSE	14	39	D.T(+100.02)SVDLEETGRVLSIGDGIARVHGLRN.V	99.9	59.88	2863.48	-6.8	716.872	4	73.15	1	Succinic anhydride labeling reagent light
sp|Q9CQ60|6PGL_MOUSE	202	231	F.V(+104.04)ATGEGK(+104.04)AAVLK(+104.04)RILEDK(+104.04)EGTLPAALVQPR.T	99.9	59.72	3545.95	-0.9	1182.99	3	88.33	4	Succinic anhydride labeling reagent heavy (+4amu 4H2)
tr|D3Z4X1|D3Z4X1_MOUSE	119	148	F.V(+104.04)ATGEGK(+104.04)AAVLK(+104.04)RILEDK(+104.04)EGTLPAALVQPR.T	99.9	59.72	3545.95	-0.9	1182.99	3	88.33	4	Succinic anhydride labeling reagent heavy (+4amu 4H2)
sp|P17426|AP2A1_MOUSE	664	681	L.R(+100.02)AAPPPAAPPAPVGGNLL.V	99.9	59.57	1764.95	-9.7	883.475	2	68.42	1	Succinic anhydride labeling reagent light
tr|F6TPX8|F6TPX8_MOUSE	8	25	L.R(+100.02)AAPPPAAPPAPVGGNLL.V	99.9	59.57	1764.95	-9.7	883.475	2	68.42	1	Succinic anhydride labeling reagent light
sp|P48962|ADT1_MOUSE	12	34	D.F(+100.02)LAGGIAAAVSK(+100.02)TAVAPIERVK(+100.02)L.L	99.9	59.44	2581.4	-5.2	861.47	3	94.55	3	Succinic anhydride labeling reagent light
sp|Q64332|SYN2_MOUSE	85	115	F.F(+100.02)SSLSQAVK(+100.02)QTAASAGLVDAPAPSAASRK(+100.02)AK(+100.02).V	99.9	59.37	3414.68	-0.1	1139.23	3	86.75	4	Succinic anhydride labeling reagent light
sp|P05202|AATM_MOUSE	402	427	Y.M(+100.02)TK(+100.02)DGRISVAGVTSGNVGYLAHAIHQ.V	99.9	59.3	2881.4	-5	961.47	3	71.57	2	Succinic anhydride labeling reagent light
sp|P52480|KPYM_MOUSE	453	468	A.V(+100.02)TRNPQTARQAHLYRG.I	99.9	58.94	1967.01	-11.5	492.754	4	49.34	1	Succinic anhydride labeling reagent light
sp|P08249|MDHM_MOUSE	25	42	N.A(+100.02)K(+100.02)VAVLGASGGIGQPLSL.L	99.9	58.27	1836.98	-3.3	919.496	2	85.06	2	Succinic anhydride labeling reagent light
sp|P60710|ACTB_MOUSE	21	42	G.F(+104.04)AGDDAPRAVFPSIVGRPRHQG.V	99.9	58.21	2453.25	-11.6	614.313	4	65.09	1	Succinic anhydride labeling reagent heavy (+4amu 4H2)
sp|P68033|ACTC_MOUSE	23	44	G.F(+104.04)AGDDAPRAVFPSIVGRPRHQG.V	99.9	58.21	2453.25	-11.6	614.313	4	65.09	1	Succinic anhydride labeling reagent heavy (+4amu 4H2)
sp|P68134|ACTS_MOUSE	23	44	G.F(+104.04)AGDDAPRAVFPSIVGRPRHQG.V	99.9	58.21	2453.25	-11.6	614.313	4	65.09	1	Succinic anhydride labeling reagent heavy (+4amu 4H2)
tr|E9Q5F4|E9Q5F4_MOUSE	21	42	G.F(+104.04)AGDDAPRAVFPSIVGRPRHQG.V	99.9	58.21	2453.25	-11.6	614.313	4	65.09	1	Succinic anhydride labeling reagent heavy (+4amu 4H2)
sp|Q61171|PRDX2_MOUSE	85	104	L.A(+100.02)WINTPRK(+100.02)EGGLGPLNIPLL.A	99.9	57.64	2358.26	-3.3	787.091	3	90.28	2	Succinic anhydride labeling reagent light
sp|P14152|MDHC_MOUSE	289	307	F.P(+100.02)VVIK(+100.02)NK(+100.02)TWK(+100.02)FVEGLPIND.F	99.9	57.42	2596.29	-5.3	1299.15	2	101	4	Succinic anhydride labeling reagent light
sp|P48962|ADT1_MOUSE	12	35	D.F(+100.02)LAGGIAAAVSK(+100.02)TAVAPIERVK(+100.02)LL.L	99.9	57.38	2694.48	-3.1	899.166	3	98.15	3	Succinic anhydride labeling reagent light
sp|P01942|HBA_MOUSE	107	128	L.L(+104.04)VTLASHHPADFTPAVHASLDK(+104.04).F	99.9	57.21	2534.29	-6.9	845.764	3	72.07	2	Succinic anhydride labeling reagent heavy (+4amu 4H2)
tr|Q91VB8|Q91VB8_MOUSE	107	128	L.L(+104.04)VTLASHHPADFTPAVHASLDK(+104.04).F	99.9	57.21	2534.29	-6.9	845.764	3	72.07	2	Succinic anhydride labeling reagent heavy (+4amu 4H2)
sp|Q61548|AP180_MOUSE	73	93	W.V(+104.04)VVFK(+104.04)ALVTTHHLMVHGNERF.I	99.9	56.81	2641.39	-3.2	661.353	4	85.63	2	Succinic anhydride labeling reagent heavy (+4amu 4H2)
tr|E9Q9A3|E9Q9A3_MOUSE	73	93	W.V(+104.04)VVFK(+104.04)ALVTTHHLMVHGNERF.I	99.9	56.81	2641.39	-3.2	661.353	4	85.63	2	Succinic anhydride labeling reagent heavy (+4amu 4H2)
tr|E9QLK9|E9QLK9_MOUSE	73	93	W.V(+104.04)VVFK(+104.04)ALVTTHHLMVHGNERF.I	99.9	56.81	2641.39	-3.2	661.353	4	85.63	2	Succinic anhydride labeling reagent heavy (+4amu 4H2)
tr|E9QQ05|E9QQ05_MOUSE	73	93	W.V(+104.04)VVFK(+104.04)ALVTTHHLMVHGNERF.I	99.9	56.81	2641.39	-3.2	661.353	4	85.63	2	Succinic anhydride labeling reagent heavy (+4amu 4H2)
tr|Q3TWS4|Q3TWS4_MOUSE	73	93	W.V(+104.04)VVFK(+104.04)ALVTTHHLMVHGNERF.I	99.9	56.81	2641.39	-3.2	661.353	4	85.63	2	Succinic anhydride labeling reagent heavy (+4amu 4H2)
tr|Q8BQA2|Q8BQA2_MOUSE	73	93	W.V(+104.04)VVFK(+104.04)ALVTTHHLMVHGNERF.I	99.9	56.81	2641.39	-3.2	661.353	4	85.63	2	Succinic anhydride labeling reagent heavy (+4amu 4H2)
sp|P48962|ADT1_MOUSE	12	34	D.F(+104.04)LAGGIAAAVSK(+104.04)TAVAPIERVK(+104.04)L.L	99.9	56.45	2593.48	-14	865.487	3	69.44	3	Succinic anhydride labeling reagent heavy (+4amu 4H2)
sp|P04370|MBP_MOUSE	153	165	T.M(+42.01)(+15.99)DHARHGFLPRHR.D	99.9	56.33	1686.83	-10.6	422.71	4	43.23	0	Acetylation (N-term); Oxidation (M)
sp|P60710|ACTB_MOUSE	32	52	F.P(+100.02)SIVGRPRHQGVM(+15.99)VGMGQK(+100.02)DS.Y	99.9	56.16	2451.16	-10	818.053	3	57.23	2	Succinic anhydride labeling reagent light; Oxidation (M)
sp|P68033|ACTC_MOUSE	34	54	F.P(+100.02)SIVGRPRHQGVM(+15.99)VGMGQK(+100.02)DS.Y	99.9	56.16	2451.16	-10	818.053	3	57.23	2	Succinic anhydride labeling reagent light; Oxidation (M)
sp|P68134|ACTS_MOUSE	34	54	F.P(+100.02)SIVGRPRHQGVM(+15.99)VGMGQK(+100.02)DS.Y	99.9	56.16	2451.16	-10	818.053	3	57.23	2	Succinic anhydride labeling reagent light; Oxidation (M)
tr|E9Q5F4|E9Q5F4_MOUSE	32	52	F.P(+100.02)SIVGRPRHQGVM(+15.99)VGMGQK(+100.02)DS.Y	99.9	56.16	2451.16	-10	818.053	3	57.23	2	Succinic anhydride labeling reagent light; Oxidation (M)
sp|P08249|MDHM_MOUSE	139	168	C.I(+104.04)IANPVNSTIPITAEVFK(+104.04)K(+104.04)HGVYNPNK(+104.04)IFG.V	99.9	56.05	3696.96	-0.8	1233.33	3	88.75	4	Succinic anhydride labeling reagent heavy (+4amu 4H2)
tr|A8DUK4|A8DUK4_MOUSE	134	147	K.V(+100.02)VAGVAAALAHK(+100.02)YH	99.9	56.05	1605.82	-1.8	803.913	2	84.22	2	Succinic anhydride labeling reagent light
sp|P08249|MDHM_MOUSE	43	55	L.L(+104.04)LK(+104.04)NSPLVSRLTL.Y	99.9	55.48	1660.99	-3.3	831.497	2	86.42	2	Succinic anhydride labeling reagent heavy (+4amu 4H2)
sp|P04370|MBP_MOUSE	153	165	T.M(+42.01)DHARHGFLPRHR.D	99.9	55.47	1670.83	-9.7	418.711	4	47.75	0	Acetylation (N-term)
sp|P08249|MDHM_MOUSE	224	258	L.A(+100.02)TLTGRIQEAGTEVVK(+100.02)AK(+100.02)AGAGSATLSMAYAGARF.V	99.8	55.28	3753.85	-22.5	939.449	4	62.38	3	Succinic anhydride labeling reagent light
tr|A8DUK4|A8DUK4_MOUSE	131	147	A.F(+104.04)QK(+104.04)VVAGVAAALAHK(+104.04)YH	99.9	54.92	2121.13	-4.8	1061.57	2	98.36	3	Succinic anhydride labeling reagent heavy (+4amu 4H2)
tr|A8DUK4|A8DUK4_MOUSE	131	147	A.F(+100.02)QK(+100.02)VVAGVAAALAHK(+100.02)YH	99.9	54.55	2109.05	-4.2	1055.53	2	98.42	3	Succinic anhydride labeling reagent light
sp|P04370|MBP_MOUSE	154	172	M.D(+100.02)HARHGFLPRHRDTGILDS.I	99.9	54.52	2299.12	-12.9	575.78	4	53.34	1	Succinic anhydride labeling reagent light
sp|P14152|MDHC_MOUSE	289	306	F.P(+100.02)VVIK(+100.02)NK(+100.02)TWK(+100.02)FVEGLPIN.D	99.9	53.99	2481.27	-7	1241.63	2	102.5	4	Succinic anhydride labeling reagent light
sp|P62631|EF1A2_MOUSE	344	360	Q.V(+100.02)IILNHPGQISAGYSPV.I	99.9	53.89	1863.97	-3	932.991	2	76.98	1	Succinic anhydride labeling reagent light
sp|P06745|G6PI_MOUSE	2	12	M.A(+42.01)ALTRNPQFQK(+104.04).L	99.9	53.78	1418.75	-10.5	710.373	2	62.12	1	Acetylation (N-term); Succinic anhydride labeling reagent heavy (+4amu 4H2)
sp|P01942|HBA_MOUSE	107	126	L.L(+100.02)VTLASHHPADFTPAVHASL.D	99.9	53.74	2183.1	-6.3	728.703	3	72.82	1	Succinic anhydride labeling reagent light
tr|Q91VB8|Q91VB8_MOUSE	107	126	L.L(+100.02)VTLASHHPADFTPAVHASL.D	99.9	53.74	2183.1	-6.3	728.703	3	72.82	1	Succinic anhydride labeling reagent light
sp|P62631|EF1A2_MOUSE	344	359	Q.V(+100.02)IILNHPGQISAGYSP.V	99.9	53.46	1764.9	-6.1	883.454	2	74.82	1	Succinic anhydride labeling reagent light
sp|P05202|AATM_MOUSE	402	427	Y.M(+104.04)TK(+104.04)DGRISVAGVTSGNVGYLAHAIHQ.V	99.9	52.84	2889.45	-5.9	964.153	3	71.59	2	Succinic anhydride labeling reagent heavy (+4amu 4H2)
sp|Q03265|ATPA_MOUSE	69	88	L.E(+100.02)ETGRVLSIGDGIARVHGLR.N	99.9	52.66	2234.18	-10.5	559.546	4	67.2	1	Succinic anhydride labeling reagent light
tr|D3Z6F5|D3Z6F5_MOUSE	19	38	L.E(+100.02)ETGRVLSIGDGIARVHGLR.N	99.9	52.66	2234.18	-10.5	559.546	4	67.2	1	Succinic anhydride labeling reagent light
sp|P06745|G6PI_MOUSE	2	11	M.A(+42.01)ALTRNPQFQ.K	99.9	52.61	1186.61	-9.7	594.306	2	60.34	0	Acetylation (N-term)
sp|P60710|ACTB_MOUSE	21	52	G.F(+100.02)AGDDAPRAVFPSIVGRPRHQGVMVGM(+15.99)GQK(+100.02)DS.Y	99.9	52.6	3597.71	-8.2	900.427	4	66.97	2	Succinic anhydride labeling reagent light; Oxidation (M)
sp|P68033|ACTC_MOUSE	23	54	G.F(+100.02)AGDDAPRAVFPSIVGRPRHQGVMVGM(+15.99)GQK(+100.02)DS.Y	99.9	52.6	3597.71	-8.2	900.427	4	66.97	2	Succinic anhydride labeling reagent light; Oxidation (M)
sp|P68134|ACTS_MOUSE	23	54	G.F(+100.02)AGDDAPRAVFPSIVGRPRHQGVMVGM(+15.99)GQK(+100.02)DS.Y	99.9	52.6	3597.71	-8.2	900.427	4	66.97	2	Succinic anhydride labeling reagent light; Oxidation (M)
tr|E9Q5F4|E9Q5F4_MOUSE	21	52	G.F(+100.02)AGDDAPRAVFPSIVGRPRHQGVMVGM(+15.99)GQK(+100.02)DS.Y	99.9	52.6	3597.71	-8.2	900.427	4	66.97	2	Succinic anhydride labeling reagent light; Oxidation (M)
sp|Q61548|AP180_MOUSE	80	93	L.V(+100.02)TTHHLM(+15.99)VHGNERF.I	99.9	51.94	1792.83	-11	449.21	4	53.81	1	Succinic anhydride labeling reagent light; Oxidation (M)
tr|E9Q9A3|E9Q9A3_MOUSE	80	93	L.V(+100.02)TTHHLM(+15.99)VHGNERF.I	99.9	51.94	1792.83	-11	449.21	4	53.81	1	Succinic anhydride labeling reagent light; Oxidation (M)
tr|E9QLK9|E9QLK9_MOUSE	80	93	L.V(+100.02)TTHHLM(+15.99)VHGNERF.I	99.9	51.94	1792.83	-11	449.21	4	53.81	1	Succinic anhydride labeling reagent light; Oxidation (M)
tr|E9QQ05|E9QQ05_MOUSE	80	93	L.V(+100.02)TTHHLM(+15.99)VHGNERF.I	99.9	51.94	1792.83	-11	449.21	4	53.81	1	Succinic anhydride labeling reagent light; Oxidation (M)
tr|Q3TWS4|Q3TWS4_MOUSE	80	93	L.V(+100.02)TTHHLM(+15.99)VHGNERF.I	99.9	51.94	1792.83	-11	449.21	4	53.81	1	Succinic anhydride labeling reagent light; Oxidation (M)
tr|Q8BQA2|Q8BQA2_MOUSE	80	93	L.V(+100.02)TTHHLM(+15.99)VHGNERF.I	99.9	51.94	1792.83	-11	449.21	4	53.81	1	Succinic anhydride labeling reagent light; Oxidation (M)
sp|Q8K0T0|RTN1_MOUSE	757	778	L.V(+104.04)RTHINTVVAK(+104.04)IQAK(+104.04)IPGAK(+104.04)RH.A	99.9	51.73	2852.62	-14.5	714.152	4	77	4	Succinic anhydride labeling reagent heavy (+4amu 4H2)
tr|A3QM89|A3QM89_MOUSE	230	251	L.V(+104.04)RTHINTVVAK(+104.04)IQAK(+104.04)IPGAK(+104.04)RH.A	99.9	51.73	2852.62	-14.5	714.152	4	77	4	Succinic anhydride labeling reagent heavy (+4amu 4H2)
tr|Q7M6W1|Q7M6W1_MOUSE	185	206	L.V(+104.04)RTHINTVVAK(+104.04)IQAK(+104.04)IPGAK(+104.04)RH.A	99.9	51.73	2852.62	-14.5	714.152	4	77	4	Succinic anhydride labeling reagent heavy (+4amu 4H2)
sp|P51881|ADT2_MOUSE	9	34	F.A(+100.02)K(+100.02)DFLAGGVAAAISK(+100.02)TAVAPIERVK(+100.02)L.L	99.9	51.71	2995.58	-3.1	999.529	3	95.17	4	Succinic anhydride labeling reagent light
sp|P14152|MDHC_MOUSE	227	256	T.V(+100.02)QQRGAAVIK(+100.02)ARK(+100.02)LSSAMSAAK(+100.02)AIADHIRD.I	99.9	51.53	3561.82	-2.1	891.461	4	84.05	4	Succinic anhydride labeling reagent light
sp|P06745|G6PI_MOUSE	2	10	M.A(+42.01)ALTRNPQF.Q	99.9	51.33	1058.55	-9.1	530.278	2	63.72	0	Acetylation (N-term)
sp|P97807|FUMH_MOUSE	270	309	L.A(+100.02)AGGTAVGTGLNTRIGFAEK(+100.02)VAAK(+100.02)VAALTGLPFVTAPNK(+100.02)F.E	99.9	50.95	4286.21	-8.7	1072.55	4	104.48	4	Succinic anhydride labeling reagent light
sp|P48962|ADT1_MOUSE	12	30	D.F(+104.04)LAGGIAAAVSK(+104.04)TAVAPIE.R	99.8	50.93	1993.09	-13.5	997.537	2	70.66	2	Succinic anhydride labeling reagent heavy (+4amu 4H2)
sp|Q9D3D9|ATPD_MOUSE	71	97	L.A(+100.02)SHVPTLQVLRPGLVVVHTEDGTTTK(+100.02)Y.F	99.9	50.92	3117.6	-5.2	1040.2	3	72.28	2	Succinic anhydride labeling reagent light
tr|D3Z7S4|D3Z7S4_MOUSE	71	97	L.A(+100.02)SHVPTLQVLRPGLVVVHTEDGTTTK(+100.02)Y.F	99.9	50.92	3117.6	-5.2	1040.2	3	72.28	2	Succinic anhydride labeling reagent light
sp|P04370|MBP_MOUSE	154	171	M.D(+104.04)HARHGFLPRHRDTGILD.S	99.9	50.35	2216.11	-13.5	555.028	4	52.96	1	Succinic anhydride labeling reagent heavy (+4amu 4H2)
sp|P01942|HBA_MOUSE	107	123	L.L(+104.04)VTLASHHPADFTPAVH.A	99.9	50.3	1915.97	-10	639.659	3	69.5	1	Succinic anhydride labeling reagent heavy (+4amu 4H2)
tr|Q91VB8|Q91VB8_MOUSE	107	123	L.L(+104.04)VTLASHHPADFTPAVH.A	99.9	50.3	1915.97	-10	639.659	3	69.5	1	Succinic anhydride labeling reagent heavy (+4amu 4H2)
sp|Q64332|SYN2_MOUSE	186	205	L.I(+100.02)RQHAFGM(+15.99)AENEDFRHLVIG.M	99.9	50.21	2455.17	-7.4	614.795	4	67.13	1	Succinic anhydride labeling reagent light; Oxidation (M)
sp|P48962|ADT1_MOUSE	12	30	D.F(+100.02)LAGGIAAAVSK(+100.02)TAVAPIE.R	99.9	50.07	1985.04	-4.6	993.521	2	94.96	2	Succinic anhydride labeling reagent light
sp|Q61548|AP180_MOUSE	73	85	W.V(+104.04)VVFK(+104.04)ALVTTHHL.M	99.9	49.71	1670.95	-3.6	836.478	2	92.54	2	Succinic anhydride labeling reagent heavy (+4amu 4H2)
tr|E9Q9A3|E9Q9A3_MOUSE	73	85	W.V(+104.04)VVFK(+104.04)ALVTTHHL.M	99.9	49.71	1670.95	-3.6	836.478	2	92.54	2	Succinic anhydride labeling reagent heavy (+4amu 4H2)
tr|E9QLK9|E9QLK9_MOUSE	73	85	W.V(+104.04)VVFK(+104.04)ALVTTHHL.M	99.9	49.71	1670.95	-3.6	836.478	2	92.54	2	Succinic anhydride labeling reagent heavy (+4amu 4H2)
tr|E9QQ05|E9QQ05_MOUSE	73	85	W.V(+104.04)VVFK(+104.04)ALVTTHHL.M	99.9	49.71	1670.95	-3.6	836.478	2	92.54	2	Succinic anhydride labeling reagent heavy (+4amu 4H2)
tr|Q3TWS4|Q3TWS4_MOUSE	73	85	W.V(+104.04)VVFK(+104.04)ALVTTHHL.M	99.9	49.71	1670.95	-3.6	836.478	2	92.54	2	Succinic anhydride labeling reagent heavy (+4amu 4H2)
tr|Q8BQA2|Q8BQA2_MOUSE	73	85	W.V(+104.04)VVFK(+104.04)ALVTTHHL.M	99.9	49.71	1670.95	-3.6	836.478	2	92.54	2	Succinic anhydride labeling reagent heavy (+4amu 4H2)
sp|P04370|MBP_MOUSE	153	171	T.M(+42.01)DHARHGFLPRHRDTGILD.S	99.9	49.56	2285.12	-11.5	572.282	4	55.08	0	Acetylation (N-term)
sp|Q03265|ATPA_MOUSE	64	88	D.T(+100.02)SVDLEETGRVLSIGDGIARVHGLR.N	99.9	49.27	2749.44	-6.8	688.362	4	74.22	1	Succinic anhydride labeling reagent light
tr|D3Z6F5|D3Z6F5_MOUSE	14	38	D.T(+100.02)SVDLEETGRVLSIGDGIARVHGLR.N	99.9	49.27	2749.44	-6.8	688.362	4	74.22	1	Succinic anhydride labeling reagent light
sp|P06745|G6PI_MOUSE	2	12	M.A(+42.01)ALTRNPQFQK(+100.02).L	99.9	49.22	1414.72	-13	708.358	2	62.47	1	Acetylation (N-term); Succinic anhydride labeling reagent light
sp|P14152|MDHC_MOUSE	289	306	F.P(+104.04)VVIK(+104.04)NK(+104.04)TWK(+104.04)FVEGLPIN.D	99.9	49.17	2497.37	-7.4	1249.68	2	101.42	4	Succinic anhydride labeling reagent heavy (+4amu 4H2)
sp|P60710|ACTB_MOUSE	32	52	F.P(+100.02)SIVGRPRHQGVMVGMGQK(+100.02)DS.Y	99.9	49.1	2435.17	-9.7	812.722	3	60.99	2	Succinic anhydride labeling reagent light
sp|P68033|ACTC_MOUSE	34	54	F.P(+100.02)SIVGRPRHQGVMVGMGQK(+100.02)DS.Y	99.9	49.1	2435.17	-9.7	812.722	3	60.99	2	Succinic anhydride labeling reagent light
sp|P68134|ACTS_MOUSE	34	54	F.P(+100.02)SIVGRPRHQGVMVGMGQK(+100.02)DS.Y	99.9	49.1	2435.17	-9.7	812.722	3	60.99	2	Succinic anhydride labeling reagent light
tr|E9Q5F4|E9Q5F4_MOUSE	32	52	F.P(+100.02)SIVGRPRHQGVMVGMGQK(+100.02)DS.Y	99.9	49.1	2435.17	-9.7	812.722	3	60.99	2	Succinic anhydride labeling reagent light
sp|Q9DB20|ATPO_MOUSE	75	105	V.SLAVLNPYIKRTVK(+100.02)VK(+100.02)SLNDITK(+100.02)REK(+100.02)FSPLT.A	99.9	48.96	3958.13	-21.7	1320.36	3	82.69	4	Succinic anhydride labeling reagent light
sp|Q61548|AP180_MOUSE	73	85	W.V(+100.02)VVFK(+100.02)ALVTTHHL.M	99.9	48.95	1662.9	-4.6	832.452	2	92.68	2	Succinic anhydride labeling reagent light
tr|E9Q9A3|E9Q9A3_MOUSE	73	85	W.V(+100.02)VVFK(+100.02)ALVTTHHL.M	99.9	48.95	1662.9	-4.6	832.452	2	92.68	2	Succinic anhydride labeling reagent light
tr|E9QLK9|E9QLK9_MOUSE	73	85	W.V(+100.02)VVFK(+100.02)ALVTTHHL.M	99.9	48.95	1662.9	-4.6	832.452	2	92.68	2	Succinic anhydride labeling reagent light
tr|E9QQ05|E9QQ05_MOUSE	73	85	W.V(+100.02)VVFK(+100.02)ALVTTHHL.M	99.9	48.95	1662.9	-4.6	832.452	2	92.68	2	Succinic anhydride labeling reagent light
tr|Q3TWS4|Q3TWS4_MOUSE	73	85	W.V(+100.02)VVFK(+100.02)ALVTTHHL.M	99.9	48.95	1662.9	-4.6	832.452	2	92.68	2	Succinic anhydride labeling reagent light
tr|Q8BQA2|Q8BQA2_MOUSE	73	85	W.V(+100.02)VVFK(+100.02)ALVTTHHL.M	99.9	48.95	1662.9	-4.6	832.452	2	92.68	2	Succinic anhydride labeling reagent light
sp|Q91VR2|ATPG_MOUSE	130	143	M.I(+100.02)VGVGEK(+100.02)IK(+100.02)GILYR.T	99.9	48.74	1843.99	-3.6	923	2	96.69	3	Succinic anhydride labeling reagent light
tr|A2AKU9|A2AKU9_MOUSE	130	143	M.I(+100.02)VGVGEK(+100.02)IK(+100.02)GILYR.T	99.9	48.74	1843.99	-3.6	923	2	96.69	3	Succinic anhydride labeling reagent light
tr|A2AKV1|A2AKV1_MOUSE	106	119	M.I(+100.02)VGVGEK(+100.02)IK(+100.02)GILYR.T	99.9	48.74	1843.99	-3.6	923	2	96.69	3	Succinic anhydride labeling reagent light
tr|A2AKV2|A2AKV2_MOUSE	106	119	M.I(+100.02)VGVGEK(+100.02)IK(+100.02)GILYR.T	99.9	48.74	1843.99	-3.6	923	2	96.69	3	Succinic anhydride labeling reagent light
tr|A2AKV3|A2AKV3_MOUSE	106	119	M.I(+100.02)VGVGEK(+100.02)IK(+100.02)GILYR.T	99.9	48.74	1843.99	-3.6	923	2	96.69	3	Succinic anhydride labeling reagent light
tr|Q8C2Q8|Q8C2Q8_MOUSE	106	119	M.I(+100.02)VGVGEK(+100.02)IK(+100.02)GILYR.T	99.9	48.74	1843.99	-3.6	923	2	96.69	3	Succinic anhydride labeling reagent light
sp|Q7TMF3|NDUAC_MOUSE	4	21	L.V(+104.04)EVLK(+104.04)RGVQQVTGHGGLR.G	99.9	48.6	2140.18	-2.8	714.4	3	78.53	2	Succinic anhydride labeling reagent heavy (+4amu 4H2)
sp|P06745|G6PI_MOUSE	2	13	M.A(+42.01)ALTRNPQFQK(+104.04)L.L	99.9	48.48	1531.83	-8.9	766.915	2	69.53	1	Acetylation (N-term); Succinic anhydride labeling reagent heavy (+4amu 4H2)
sp|P01942|HBA_MOUSE	107	121	L.L(+104.04)VTLASHHPADFTPA.V	99.9	48.33	1679.85	-7.1	840.924	2	71.85	1	Succinic anhydride labeling reagent heavy (+4amu 4H2)
tr|Q91VB8|Q91VB8_MOUSE	107	121	L.L(+104.04)VTLASHHPADFTPA.V	99.9	48.33	1679.85	-7.1	840.924	2	71.85	1	Succinic anhydride labeling reagent heavy (+4amu 4H2)
sp|P17751|TPIS_MOUSE	145	169	L.G(+100.02)HSERRHVFGESDELIGQK(+100.02)VSHALA.E	99.9	48.29	2958.42	-9.9	740.605	4	66.84	2	Succinic anhydride labeling reagent light
tr|H7BXC3|H7BXC3_MOUSE	13	37	L.G(+100.02)HSERRHVFGESDELIGQK(+100.02)VSHALA.E	99.9	48.29	2958.42	-9.9	740.605	4	66.84	2	Succinic anhydride labeling reagent light
sp|P34884|MIF_MOUSE	24	46	L.T(+104.04)QQLAQATGK(+104.04)PAQYIAVHVVPDQ.L	99.9	48.25	2670.37	-12.7	891.121	3	74.58	2	Succinic anhydride labeling reagent heavy (+4amu 4H2)
sp|P05064|ALDOA_MOUSE	2	31	M.PHPYPALTPEQK(+100.02)K(+100.02)ELSDIAHRIVAPGK(+100.02)GIL.A	99.9	48.17	3574.87	-2.8	894.721	4	80.19	3	Succinic anhydride labeling reagent light
tr|A6ZI44|A6ZI44_MOUSE	56	85	M.PHPYPALTPEQK(+100.02)K(+100.02)ELSDIAHRIVAPGK(+100.02)GIL.A	99.9	48.17	3574.87	-2.8	894.721	4	80.19	3	Succinic anhydride labeling reagent light
sp|P06745|G6PI_MOUSE	2	13	M.A(+42.01)ALTRNPQFQK(+100.02)L.L	99.9	48.13	1527.8	-9	764.903	2	69.39	1	Acetylation (N-term); Succinic anhydride labeling reagent light
sp|P08249|MDHM_MOUSE	43	55	L.L(+100.02)LK(+100.02)NSPLVSRLTL.Y	99.9	48.08	1652.93	-2.6	827.472	2	86.4	2	Succinic anhydride labeling reagent light
sp|P48962|ADT1_MOUSE	13	34	F.L(+104.04)AGGIAAAVSK(+104.04)TAVAPIERVK(+104.04)L.L	99.6	47.97	2446.41	-14	816.465	3	66.57	3	Succinic anhydride labeling reagent heavy (+4amu 4H2)
sp|Q61548|AP180_MOUSE	80	93	L.V(+104.04)TTHHLMVHGNERF.I	99.9	47.75	1780.86	-10.9	446.218	4	55.55	1	Succinic anhydride labeling reagent heavy (+4amu 4H2)
tr|E9Q9A3|E9Q9A3_MOUSE	80	93	L.V(+104.04)TTHHLMVHGNERF.I	99.9	47.75	1780.86	-10.9	446.218	4	55.55	1	Succinic anhydride labeling reagent heavy (+4amu 4H2)
tr|E9QLK9|E9QLK9_MOUSE	80	93	L.V(+104.04)TTHHLMVHGNERF.I	99.9	47.75	1780.86	-10.9	446.218	4	55.55	1	Succinic anhydride labeling reagent heavy (+4amu 4H2)
tr|E9QQ05|E9QQ05_MOUSE	80	93	L.V(+104.04)TTHHLMVHGNERF.I	99.9	47.75	1780.86	-10.9	446.218	4	55.55	1	Succinic anhydride labeling reagent heavy (+4amu 4H2)
tr|Q3TWS4|Q3TWS4_MOUSE	80	93	L.V(+104.04)TTHHLMVHGNERF.I	99.9	47.75	1780.86	-10.9	446.218	4	55.55	1	Succinic anhydride labeling reagent heavy (+4amu 4H2)
tr|Q8BQA2|Q8BQA2_MOUSE	80	93	L.V(+104.04)TTHHLMVHGNERF.I	99.9	47.75	1780.86	-10.9	446.218	4	55.55	1	Succinic anhydride labeling reagent heavy (+4amu 4H2)
sp|P04370|MBP_MOUSE	152	164	S.T(+100.02)M(+15.99)DHARHGFLPRH.R	99.9	47.71	1689.78	-11.6	423.447	4	47.14	1	Oxidation (M)
sp|Q9CQ60|6PGL_MOUSE	202	231	F.V(+100.02)ATGEGK(+100.02)AAVLK(+100.02)RILEDK(+100.02)EGTLPAALVQPR.T	99.7	47.6	3529.85	-24.1	883.449	4	64.74	4	Succinic anhydride labeling reagent light
tr|D3Z4X1|D3Z4X1_MOUSE	119	148	F.V(+100.02)ATGEGK(+100.02)AAVLK(+100.02)RILEDK(+100.02)EGTLPAALVQPR.T	99.7	47.6	3529.85	-24.1	883.449	4	64.74	4	Succinic anhydride labeling reagent light
sp|P14152|MDHC_MOUSE	227	256	T.V(+104.04)QQRGAAVIK(+104.04)ARK(+104.04)LSSAMSAAK(+104.04)AIADHIRD.I	99.9	47.47	3577.92	-2.8	895.485	4	83.94	4	Succinic anhydride labeling reagent heavy (+4amu 4H2)
sp|P48962|ADT1_MOUSE	12	36	D.F(+100.02)LAGGIAAAVSK(+100.02)TAVAPIERVK(+100.02)LLL.Q	99.9	47.37	2807.57	-7	936.857	3	106	3	Succinic anhydride labeling reagent light
sp|Q9CPQ1|COX6C_MOUSE	29	51	F.I(+100.02)VALGVAAAYK(+100.02)FGVAEPRK(+100.02)K(+100.02)AYA.E	99.7	47.3	2792.43	-24	931.794	3	73.7	4	Succinic anhydride labeling reagent light
sp|P08249|MDHM_MOUSE	139	168	C.I(+100.02)IANPVNSTIPITAEVFK(+100.02)K(+100.02)HGVYNPNK(+100.02)IFG.V	99.9	47.21	3680.86	-0.1	1227.96	3	88.96	4	Succinic anhydride labeling reagent light
tr|A8DUK4|A8DUK4_MOUSE	114	147	I.V(+100.02)LGHHLGK(+100.02)DFTPAAQAAFQK(+100.02)VVAGVAAALAHK(+100.02)YH	99.9	47.09	3922.96	-4	981.744	4	94.95	4	Succinic anhydride labeling reagent light
sp|P04370|MBP_MOUSE	153	166	T.M(+42.01)DHARHGFLPRHRD.T	99.9	47.06	1785.86	-11	447.467	4	47.42	0	Acetylation (N-term)
sp|P60710|ACTB_MOUSE	21	40	G.F(+104.04)AGDDAPRAVFPSIVGRPRH.Q	99.9	46.79	2268.17	-10.5	757.056	3	66.35	1	Succinic anhydride labeling reagent heavy (+4amu 4H2)
sp|P68033|ACTC_MOUSE	23	42	G.F(+104.04)AGDDAPRAVFPSIVGRPRH.Q	99.9	46.79	2268.17	-10.5	757.056	3	66.35	1	Succinic anhydride labeling reagent heavy (+4amu 4H2)
sp|P68134|ACTS_MOUSE	23	42	G.F(+104.04)AGDDAPRAVFPSIVGRPRH.Q	99.9	46.79	2268.17	-10.5	757.056	3	66.35	1	Succinic anhydride labeling reagent heavy (+4amu 4H2)
tr|E9Q5F4|E9Q5F4_MOUSE	21	40	G.F(+104.04)AGDDAPRAVFPSIVGRPRH.Q	99.9	46.79	2268.17	-10.5	757.056	3	66.35	1	Succinic anhydride labeling reagent heavy (+4amu 4H2)
sp|P05064|ALDOA_MOUSE	2	27	M.P(+104.04)HPYPALTPEQK(+104.04)K(+104.04)ELSDIAHRIVAPG.K	99.8	46.18	3175.66	-2.2	1059.56	3	79.7	3	Succinic anhydride labeling reagent heavy (+4amu 4H2)
tr|A6ZI44|A6ZI44_MOUSE	56	81	M.P(+104.04)HPYPALTPEQK(+104.04)K(+104.04)ELSDIAHRIVAPG.K	99.8	46.18	3175.66	-2.2	1059.56	3	79.7	3	Succinic anhydride labeling reagent heavy (+4amu 4H2)
sp|Q9CQ75|NDUA2_MOUSE	2	15	M.A(+42.01)AAAASRAVGAK(+100.02)LG.L	99.8	46.17	1354.72	-11.1	678.36	2	67.65	1	Acetylation (N-term); Succinic anhydride labeling reagent light
sp|Q62048|PEA15_MOUSE	49	75	F.L(+104.04)ESHNK(+104.04)LDK(+104.04)DNLSYIEHIFEISRRPDL.L	99.8	45.73	3592.81	-1.2	899.208	4	81.09	3	Succinic anhydride labeling reagent heavy (+4amu 4H2)
tr|D3Z375|D3Z375_MOUSE	49	75	F.L(+104.04)ESHNK(+104.04)LDK(+104.04)DNLSYIEHIFEISRRPDL.L	99.8	45.73	3592.81	-1.2	899.208	4	81.09	3	Succinic anhydride labeling reagent heavy (+4amu 4H2)
sp|Q91VR2|ATPG_MOUSE	130	143	M.I(+104.04)VGVGEK(+104.04)IK(+104.04)GILYR.T	99.8	45.56	1856.07	-3.3	929.038	2	96.35	3	Succinic anhydride labeling reagent heavy (+4amu 4H2)
tr|A2AKU9|A2AKU9_MOUSE	130	143	M.I(+104.04)VGVGEK(+104.04)IK(+104.04)GILYR.T	99.8	45.56	1856.07	-3.3	929.038	2	96.35	3	Succinic anhydride labeling reagent heavy (+4amu 4H2)
tr|A2AKV1|A2AKV1_MOUSE	106	119	M.I(+104.04)VGVGEK(+104.04)IK(+104.04)GILYR.T	99.8	45.56	1856.07	-3.3	929.038	2	96.35	3	Succinic anhydride labeling reagent heavy (+4amu 4H2)
tr|A2AKV2|A2AKV2_MOUSE	106	119	M.I(+104.04)VGVGEK(+104.04)IK(+104.04)GILYR.T	99.8	45.56	1856.07	-3.3	929.038	2	96.35	3	Succinic anhydride labeling reagent heavy (+4amu 4H2)
tr|A2AKV3|A2AKV3_MOUSE	106	119	M.I(+104.04)VGVGEK(+104.04)IK(+104.04)GILYR.T	99.8	45.56	1856.07	-3.3	929.038	2	96.35	3	Succinic anhydride labeling reagent heavy (+4amu 4H2)
tr|A8DUK4|A8DUK4_MOUSE	134	147	K.V(+104.04)VAGVAAALAHK(+104.04)YH	99.8	45.56	1613.87	-2.2	807.938	2	84.15	2	Succinic anhydride labeling reagent heavy (+4amu 4H2)
tr|Q8C2Q8|Q8C2Q8_MOUSE	106	119	M.I(+104.04)VGVGEK(+104.04)IK(+104.04)GILYR.T	99.8	45.56	1856.07	-3.3	929.038	2	96.35	3	Succinic anhydride labeling reagent heavy (+4amu 4H2)
sp|P04370|MBP_MOUSE	156	168	H.A(+100.02)RHGFLPRHRDTG.I	99.8	45.39	1618.81	-9.9	405.705	4	46.15	1	Succinic anhydride labeling reagent light
sp|P14152|MDHC_MOUSE	289	305	F.P(+100.02)VVIK(+100.02)NK(+100.02)TWK(+100.02)FVEGLPI.N	99.8	44.95	2367.22	-5.6	1184.61	2	106.01	4	Succinic anhydride labeling reagent light
sp|Q03265|ATPA_MOUSE	69	89	L.E(+100.02)ETGRVLSIGDGIARVHGLRN.V	99.7	44.94	2348.22	-30	588.045	4	49.06	1	Succinic anhydride labeling reagent light
tr|D3Z6F5|D3Z6F5_MOUSE	19	39	L.E(+100.02)ETGRVLSIGDGIARVHGLRN.V	99.7	44.94	2348.22	-30	588.045	4	49.06	1	Succinic anhydride labeling reagent light
sp|P60710|ACTB_MOUSE	32	52	F.P(+100.02)SIVGRPRHQGVMVGM(+15.99)GQK(+100.02)DS.Y	99.8	44.89	2451.16	-10	818.053	3	58.39	2	Succinic anhydride labeling reagent light; Oxidation (M)
sp|P68033|ACTC_MOUSE	34	54	F.P(+100.02)SIVGRPRHQGVMVGM(+15.99)GQK(+100.02)DS.Y	99.8	44.89	2451.16	-10	818.053	3	58.39	2	Succinic anhydride labeling reagent light; Oxidation (M)
sp|P68134|ACTS_MOUSE	34	54	F.P(+100.02)SIVGRPRHQGVMVGM(+15.99)GQK(+100.02)DS.Y	99.8	44.89	2451.16	-10	818.053	3	58.39	2	Succinic anhydride labeling reagent light; Oxidation (M)
tr|E9Q5F4|E9Q5F4_MOUSE	32	52	F.P(+100.02)SIVGRPRHQGVMVGM(+15.99)GQK(+100.02)DS.Y	99.8	44.89	2451.16	-10	818.053	3	58.39	2	Succinic anhydride labeling reagent light; Oxidation (M)
tr|A8DUK4|A8DUK4_MOUSE	116	147	L.G(+104.04)HHLGK(+104.04)DFTPAAQAAFQK(+104.04)VVAGVAAALAHK(+104.04)YH	99.8	44.82	3726.91	-3.6	932.732	4	92.81	4	Succinic anhydride labeling reagent heavy (+4amu 4H2)
sp|Q8K0T0|RTN1_MOUSE	757	778	L.V(+100.02)RTHINTVVAK(+100.02)IQAK(+100.02)IPGAK(+100.02)RH.A	99.8	44.77	2836.52	-3.5	710.135	4	77.19	4	Succinic anhydride labeling reagent light
tr|A3QM89|A3QM89_MOUSE	230	251	L.V(+100.02)RTHINTVVAK(+100.02)IQAK(+100.02)IPGAK(+100.02)RH.A	99.8	44.77	2836.52	-3.5	710.135	4	77.19	4	Succinic anhydride labeling reagent light
tr|Q7M6W1|Q7M6W1_MOUSE	185	206	L.V(+100.02)RTHINTVVAK(+100.02)IQAK(+100.02)IPGAK(+100.02)RH.A	99.8	44.77	2836.52	-3.5	710.135	4	77.19	4	Succinic anhydride labeling reagent light
sp|Q7TMF3|NDUAC_MOUSE	4	21	L.V(+100.02)EVLK(+100.02)RGVQQVTGHGGLR.G	99.8	44.57	2132.13	-3.7	711.716	3	78.55	2	Succinic anhydride labeling reagent light
sp|Q60829|PPR1B_MOUSE	1	24	M(+42.01)DPK(+104.04)DRK(+104.04)K(+104.04)IQFSVPAPPSQLDPRQ.V	99.8	44.13	3131.6	-6.9	1044.87	3	71.8	3	Acetylation (N-term); Succinic anhydride labeling reagent heavy (+4amu 4H2)
sp|Q9D3D9|ATPD_MOUSE	71	84	L.A(+100.02)SHVPTLQVLRPGL.V	99.8	44.1	1586.88	-8.4	794.44	2	70.67	1	Succinic anhydride labeling reagent light
tr|D3Z7S4|D3Z7S4_MOUSE	71	84	L.A(+100.02)SHVPTLQVLRPGL.V	99.8	44.1	1586.88	-8.4	794.44	2	70.67	1	Succinic anhydride labeling reagent light
sp|Q61171|PRDX2_MOUSE	85	111	L.A(+100.02)WINTPRK(+100.02)EGGLGPLNIPLLADVTK(+100.02)SL.S	99.8	44.06	3172.67	-5.7	1058.56	3	96.55	3	Succinic anhydride labeling reagent light
sp|P01942|HBA_MOUSE	108	123	L.V(+100.02)TLASHHPADFTPAVH.A	99.8	43.86	1798.86	-11	600.622	3	61.53	1	Succinic anhydride labeling reagent light
tr|Q91VB8|Q91VB8_MOUSE	108	123	L.V(+100.02)TLASHHPADFTPAVH.A	99.8	43.86	1798.86	-11	600.622	3	61.53	1	Succinic anhydride labeling reagent light
sp|Q61171|PRDX2_MOUSE	85	104	L.A(+104.04)WINTPRK(+104.04)EGGLGPLNIPLL.A	99.8	43.83	2366.31	-0.8	1184.16	2	90.16	2	Succinic anhydride labeling reagent heavy (+4amu 4H2)
sp|P08249|MDHM_MOUSE	139	167	C.I(+100.02)IANPVNSTIPITAEVFK(+100.02)K(+100.02)HGVYNPNK(+100.02)IF.G	99.7	43.74	3623.84	-22.5	1208.93	3	65.44	4	Succinic anhydride labeling reagent light
sp|Q9DB20|ATPO_MOUSE	24	36	P.F(+104.04)AK(+104.04)LVRPPVQVYG.I	99.6	43.61	1680.93	-4.4	841.47	2	82.48	2	Succinic anhydride labeling reagent heavy (+4amu 4H2)
sp|O35098|DPYL4_MOUSE	1	30	M(+42.01)(+15.99)SFQGK(+104.04)KSIPRITSDRLLIK(+104.04)GGK(+104.04)IVNDDQS.F	99.6	43.45	3700.94	-3.7	1234.65	3	73.8	3	Acetylation (N-term); Oxidation (M); Succinic anhydride labeling reagent heavy (+4amu 4H2)
tr|Q3TMU8|Q3TMU8_MOUSE	1	30	M(+42.01)(+15.99)SFQGK(+104.04)KSIPRITSDRLLIK(+104.04)GGK(+104.04)IVNDDQS.F	99.6	43.45	3700.94	-3.7	1234.65	3	73.8	3	Acetylation (N-term); Oxidation (M); Succinic anhydride labeling reagent heavy (+4amu 4H2)
sp|P14152|MDHC_MOUSE	224	256	F.I(+100.02)TTVQQRGAAVIK(+100.02)ARK(+100.02)LSSAMSAAK(+100.02)AIADHIRD.I	99.6	43.18	3877	-2.3	970.255	4	85.76	4	Succinic anhydride labeling reagent light
sp|Q9DB20|ATPO_MOUSE	27	42	K.L(+100.02)VRPPVQVYGIEGRYA.T	99.7	43.07	1916.02	-28.1	639.661	3	52.64	1	Succinic anhydride labeling reagent light
sp|P68033|ACTC_MOUSE	55	90	S.Y(+104.04)VGDEAQSK(+104.04)RGILTLK(+104.04)YPIEHGIITNWDDMEK(+104.04)IWHH.T	99.7	42.94	4708.31	-23.5	942.648	5	64.76	4	Succinic anhydride labeling reagent heavy (+4amu 4H2)
sp|P68134|ACTS_MOUSE	55	90	S.Y(+104.04)VGDEAQSK(+104.04)RGILTLK(+104.04)YPIEHGIITNWDDMEK(+104.04)IWHH.T	99.7	42.94	4708.31	-23.5	942.648	5	64.76	4	Succinic anhydride labeling reagent heavy (+4amu 4H2)
sp|Q61548|AP180_MOUSE	73	93	W.V(+100.02)VVFK(+100.02)ALVTTHHLMVHGNERF.I	99.7	42.73	2633.34	-26.7	659.325	4	63	2	Succinic anhydride labeling reagent light
tr|E9Q9A3|E9Q9A3_MOUSE	73	93	W.V(+100.02)VVFK(+100.02)ALVTTHHLMVHGNERF.I	99.7	42.73	2633.34	-26.7	659.325	4	63	2	Succinic anhydride labeling reagent light
tr|E9QLK9|E9QLK9_MOUSE	73	93	W.V(+100.02)VVFK(+100.02)ALVTTHHLMVHGNERF.I	99.7	42.73	2633.34	-26.7	659.325	4	63	2	Succinic anhydride labeling reagent light
tr|E9QQ05|E9QQ05_MOUSE	73	93	W.V(+100.02)VVFK(+100.02)ALVTTHHLMVHGNERF.I	99.7	42.73	2633.34	-26.7	659.325	4	63	1	Succinic anhydride labeling reagent light
tr|Q3TWS4|Q3TWS4_MOUSE	73	93	W.V(+100.02)VVFK(+100.02)ALVTTHHLMVHGNERF.I	99.7	42.73	2633.34	-26.7	659.325	4	63	2	Succinic anhydride labeling reagent light
tr|Q8BQA2|Q8BQA2_MOUSE	73	93	W.V(+100.02)VVFK(+100.02)ALVTTHHLMVHGNERF.I	99.7	42.73	2633.34	-26.7	659.325	4	63	2	Succinic anhydride labeling reagent light
sp|P05064|ALDOA_MOUSE	2	29	M.PHPYPALTPEQK(+100.02)K(+100.02)ELSDIAHRIVAPGK(+100.02)G.I	99.6	42.71	3348.7	-4.2	838.178	4	76.17	3	Succinic anhydride labeling reagent light
tr|A6ZI44|A6ZI44_MOUSE	56	83	M.PHPYPALTPEQK(+100.02)K(+100.02)ELSDIAHRIVAPGK(+100.02)G.I	99.6	42.71	3348.7	-4.2	838.178	4	76.17	3	Succinic anhydride labeling reagent light
tr|A8DUK4|A8DUK4_MOUSE	116	147	L.G(+100.02)HHLGKDFTPAAQAAFQK(+100.02)VVAGVAAALAHK(+100.02)YH	99.7	42.27	3610.8	-24.6	723.149	5	65.72	3	Succinic anhydride labeling reagent light
sp|P97807|FUMH_MOUSE	270	308	L.A(+100.02)AGGTAVGTGLNTRIGFAEK(+100.02)VAAK(+100.02)VAALTGLPFVTAPNK(+100.02).F	99.6	42.08	4139.14	-5.4	1035.79	4	102.32	4	Succinic anhydride labeling reagent light
sp|Q62048|PEA15_MOUSE	46	75	W.F(+104.04)SFLESHNK(+104.04)LDK(+104.04)DNLSYIEHIFEISRRPDL.L	99.6	42	3973.98	-0.6	994.501	4	87.04	3	Succinic anhydride labeling reagent heavy (+4amu 4H2)
tr|D3Z375|D3Z375_MOUSE	46	75	W.F(+104.04)SFLESHNK(+104.04)LDK(+104.04)DNLSYIEHIFEISRRPDL.L	99.6	42	3973.98	-0.6	994.501	4	87.04	3	Succinic anhydride labeling reagent heavy (+4amu 4H2)
sp|Q9D3D9|ATPD_MOUSE	71	95	L.A(+100.02)SHVPTLQVLRPGLVVVHTEDGTTT.K	99.6	41.98	2726.42	-7.8	909.808	3	70.2	1	Succinic anhydride labeling reagent light
tr|D3Z7S4|D3Z7S4_MOUSE	71	95	L.A(+100.02)SHVPTLQVLRPGLVVVHTEDGTTT.K	99.6	41.98	2726.42	-7.8	909.808	3	70.2	1	Succinic anhydride labeling reagent light
tr|A8DUK4|A8DUK4_MOUSE	113	147	V.I(+100.02)VLGHHLGK(+100.02)DFTPAAQAAFQK(+100.02)VVAGVAAALAHK(+100.02)YH	99.6	41.82	4036.05	-3.9	1010.02	4	96.2	4	Succinic anhydride labeling reagent light
sp|P04370|MBP_MOUSE	153	168	T.M(+42.01)(+15.99)DHARHGFLPRHRDTG.I	99.6	41.51	1959.92	-11.6	490.983	4	43.02	0	Acetylation (N-term); Oxidation (M)
sp|P04370|MBP_MOUSE	153	171	T.M(+42.01)(+15.99)DHARHGFLPRHRDTGILD.S	99.6	41.5	2301.12	-12.9	576.279	4	52.72	0	Acetylation (N-term); Oxidation (M)
tr|Q91VA7|Q91VA7_MOUSE	371	384	D.F(+104.04)IK(+104.04)SVIGHLHPHGG	99.6	41.44	1705.9	-2.2	569.64	3	81.04	2	Succinic anhydride labeling reagent heavy (+4amu 4H2)
sp|P34884|MIF_MOUSE	83	94	G.L(+100.02)LSDRLHISPDR.V	99.6	41.11	1520.79	-9.3	507.934	3	65.39	1	Succinic anhydride labeling reagent light
sp|P14152|MDHC_MOUSE	289	305	F.P(+104.04)VVIK(+104.04)NK(+104.04)TWK(+104.04)FVEGLPI.N	99.6	41.07	2383.33	-8.4	1192.66	2	105.58	4	Succinic anhydride labeling reagent heavy (+4amu 4H2)
sp|Q64332|SYN2_MOUSE	50	79	T.SAASPGPERRPPPAQAPAPQPAPQPAPTPS.V	99.6	41.05	2924.49	-11.2	975.826	3	49.86	0
sp|P01942|HBA_MOUSE	34	47	M.F(+100.02)ASFPTTK(+100.02)TYFPHF.D	99.6	40.92	1889.85	-1.9	945.931	2	86.38	2	Succinic anhydride labeling reagent light
tr|Q91VB8|Q91VB8_MOUSE	34	47	M.F(+100.02)ASFPTTK(+100.02)TYFPHF.D	99.6	40.92	1889.85	-1.9	945.931	2	86.38	2	Succinic anhydride labeling reagent light
sp|Q9CQ75|NDUA2_MOUSE	2	16	M.A(+42.01)AAAASRAVGAK(+100.02)LGL.R	99.5	40.87	1467.8	-4.1	734.907	2	78.17	1	Acetylation (N-term); Succinic anhydride labeling reagent light
sp|O35098|DPYL4_MOUSE	1	29	M(+42.01)(+15.99)SFQGK(+104.04)KSIPRITSDRLLIK(+104.04)GGK(+104.04)IVNDDQ.S	99.6	40.2	3613.91	-21.6	1205.62	3	54.32	3	Acetylation (N-term); Oxidation (M); Succinic anhydride labeling reagent heavy (+4amu 4H2)
tr|Q3TMU8|Q3TMU8_MOUSE	1	29	M(+42.01)(+15.99)SFQGK(+104.04)KSIPRITSDRLLIK(+104.04)GGK(+104.04)IVNDDQ.S	99.6	40.2	3613.91	-21.6	1205.62	3	54.32	3	Acetylation (N-term); Oxidation (M); Succinic anhydride labeling reagent heavy (+4amu 4H2)
sp|P34884|MIF_MOUSE	24	46	L.T(+100.02)QQLAQATGK(+100.02)PAQYIAVHVVPDQ.L	99.6	40.19	2662.32	-25.1	888.426	3	54.87	2	Succinic anhydride labeling reagent light
sp|O35098|DPYL4_MOUSE	1	26	M(+104.04)(+15.99)SFQGK(+42.01)KSIPRITSDRLLIK(+104.04)GGK(+104.04)IVN.D	99.4	39.87	3255.79	-1.8	1086.27	3	72.87	3	Succinic anhydride labeling reagent heavy (+4amu 4H2); Oxidation (M); Acetylation (K)
tr|Q3TMU8|Q3TMU8_MOUSE	1	26	M(+104.04)(+15.99)SFQGK(+42.01)KSIPRITSDRLLIK(+104.04)GGK(+104.04)IVN.D	99.4	39.87	3255.79	-1.8	1086.27	3	72.87	3	Succinic anhydride labeling reagent heavy (+4amu 4H2); Oxidation (M); Acetylation (K)
sp|Q03265|ATPA_MOUSE	76	88	L.S(+100.02)IGDGIARVHGLR.N	99.4	39.67	1449.77	-9.6	484.259	3	60.71	1	Succinic anhydride labeling reagent light
tr|D3Z6F5|D3Z6F5_MOUSE	26	38	L.S(+100.02)IGDGIARVHGLR.N	99.4	39.67	1449.77	-9.6	484.259	3	60.71	1	Succinic anhydride labeling reagent light
sp|Q03265|ATPA_MOUSE	76	88	L.S(+104.04)IGDGIARVHGLR.N	99.4	39.52	1453.79	-10.4	485.6	3	60.69	1	Succinic anhydride labeling reagent heavy (+4amu 4H2)
tr|D3Z6F5|D3Z6F5_MOUSE	26	38	L.S(+104.04)IGDGIARVHGLR.N	99.4	39.52	1453.79	-10.4	485.6	3	60.69	1	Succinic anhydride labeling reagent heavy (+4amu 4H2)
sp|P60710|ACTB_MOUSE	169	177	G.Y(+104.04)ALPHAILR.L	99.4	39.47	1156.65	-9.6	579.329	2	67.62	1	Succinic anhydride labeling reagent heavy (+4amu 4H2)
tr|E9Q5F4|E9Q5F4_MOUSE	169	177	G.Y(+104.04)ALPHAILR.L	99.4	39.47	1156.65	-9.6	579.329	2	67.62	1	Succinic anhydride labeling reagent heavy (+4amu 4H2)
sp|P04370|MBP_MOUSE	224	239	N.IVTPRTPPPSQGK(+100.02)GGR.D	99.4	39.46	1746.94	-14.6	583.311	3	47.39	1	Succinic anhydride labeling reagent light
sp|P60710|ACTB_MOUSE	21	52	G.F(+100.02)AGDDAPRAVFPSIVGRPRHQGVMVGMGQK(+100.02)DS.Y	99.4	39.38	3581.71	-7	896.43	4	68.8	2	Succinic anhydride labeling reagent light
sp|P68033|ACTC_MOUSE	23	54	G.F(+100.02)AGDDAPRAVFPSIVGRPRHQGVMVGMGQK(+100.02)DS.Y	99.4	39.38	3581.71	-7	896.43	4	68.8	2	Succinic anhydride labeling reagent light
sp|P68134|ACTS_MOUSE	23	54	G.F(+100.02)AGDDAPRAVFPSIVGRPRHQGVMVGMGQK(+100.02)DS.Y	99.4	39.38	3581.71	-7	896.43	4	68.8	2	Succinic anhydride labeling reagent light
tr|E9Q5F4|E9Q5F4_MOUSE	21	52	G.F(+100.02)AGDDAPRAVFPSIVGRPRHQGVMVGMGQK(+100.02)DS.Y	99.4	39.38	3581.71	-7	896.43	4	68.8	2	Succinic anhydride labeling reagent light
sp|P63038|CH60_MOUSE	120	143	L.A(+100.02)RSIAK(+100.02)EGFEK(+100.02)ISK(+100.02)GANPVEIRRG.V	99.6	39.23	3012.52	-27.2	754.115	4	54.66	4	Succinic anhydride labeling reagent light
tr|D3Z2F2|D3Z2F2_MOUSE	120	143	L.A(+100.02)RSIAK(+100.02)EGFEK(+100.02)ISK(+100.02)GANPVEIRRG.V	99.6	39.23	3012.52	-27.2	754.115	4	54.66	4	Succinic anhydride labeling reagent light
sp|P05064|ALDOA_MOUSE	2	29	M.P(+100.02)HPYPALTPEQK(+100.02)K(+100.02)ELSDIAHRIVAPGK(+100.02)G.I	99.4	38.96	3448.71	-2.4	863.184	4	79.67	4	Succinic anhydride labeling reagent light
tr|A6ZI44|A6ZI44_MOUSE	56	83	M.P(+100.02)HPYPALTPEQK(+100.02)K(+100.02)ELSDIAHRIVAPGK(+100.02)G.I	99.4	38.96	3448.71	-2.4	863.184	4	79.67	4	Succinic anhydride labeling reagent light
sp|P05064|ALDOA_MOUSE	2	31	M.P(+100.02)HPYPALTPEQK(+100.02)K(+100.02)ELSDIAHRIVAPGK(+100.02)GIL.A	99.6	38.88	3674.88	-25.7	919.705	4	61.24	4	Succinic anhydride labeling reagent light
sp|P17182|ENOA_MOUSE	2	12	M.S(+42.01)ILRIHAREIF.D	99.4	38.88	1395.8	-5.8	466.271	3	69.2	0	Acetylation (N-term)
tr|A6ZI44|A6ZI44_MOUSE	56	85	M.P(+100.02)HPYPALTPEQK(+100.02)K(+100.02)ELSDIAHRIVAPGK(+100.02)GIL.A	99.6	38.88	3674.88	-25.7	919.705	4	61.24	4	Succinic anhydride labeling reagent light
sp|Q9DB20|ATPO_MOUSE	24	33	P.F(+100.02)AK(+100.02)LVRPPVQ.V	99.4	38.68	1353.73	-3.9	677.869	2	79	2	Succinic anhydride labeling reagent light
sp|Q9D3D9|ATPD_MOUSE	71	95	L.A(+104.04)SHVPTLQVLRPGLVVVHTEDGTTT.K	99.4	38.67	2730.45	-8.8	911.149	3	70.18	1	Succinic anhydride labeling reagent heavy (+4amu 4H2)
tr|D3Z7S4|D3Z7S4_MOUSE	71	95	L.A(+104.04)SHVPTLQVLRPGLVVVHTEDGTTT.K	99.4	38.67	2730.45	-8.8	911.149	3	70.18	1	Succinic anhydride labeling reagent heavy (+4amu 4H2)
sp|P63044|VAMP2_MOUSE	2	41	M.S(+42.01)ATAATVPPAAPAGEGGPPAPPPNLTSNRRLQQTQAQVDE.V	99.6	38.63	4004	-27	1001.98	4	46	0	Acetylation (N-term)
tr|B0QZN5|B0QZN5_MOUSE	2	41	M.S(+42.01)ATAATVPPAAPAGEGGPPAPPPNLTSNRRLQQTQAQVDE.V	99.6	38.63	4004	-27	1001.98	4	46	0	Acetylation (N-term)
sp|Q9DB20|ATPO_MOUSE	75	105	V.S(+100.02)LAVLNPYIKRTVKVK(+100.02)SLNDITK(+100.02)REK(+100.02)FSPLT.A	99.4	38.57	3958.13	-22	1320.36	3	82.64	4	Succinic anhydride labeling reagent light
sp|Q8K0T0|RTN1_MOUSE	757	776	L.V(+100.02)RTHINTVVAK(+100.02)IQAK(+100.02)IPGAK(+100.02).R	99.4	38.5	2543.36	-1.4	848.793	3	80.62	4	Succinic anhydride labeling reagent light
tr|A3QM89|A3QM89_MOUSE	230	249	L.V(+100.02)RTHINTVVAK(+100.02)IQAK(+100.02)IPGAK(+100.02).R	99.4	38.5	2543.36	-1.4	848.793	3	80.62	4	Succinic anhydride labeling reagent light
tr|Q7M6W1|Q7M6W1_MOUSE	185	204	L.V(+100.02)RTHINTVVAK(+100.02)IQAK(+100.02)IPGAK(+100.02).R	99.4	38.5	2543.36	-1.4	848.793	3	80.62	4	Succinic anhydride labeling reagent light
sp|P60710|ACTB_MOUSE	21	51	G.F(+100.02)AGDDAPRAVFPSIVGRPRHQGVMVGMGQK(+100.02)D.S	99.4	38.44	3494.68	-9.4	874.67	4	69.05	2	Succinic anhydride labeling reagent light
sp|P68033|ACTC_MOUSE	23	53	G.F(+100.02)AGDDAPRAVFPSIVGRPRHQGVMVGMGQK(+100.02)D.S	99.4	38.44	3494.68	-9.4	874.67	4	69.05	2	Succinic anhydride labeling reagent light
sp|P68134|ACTS_MOUSE	23	53	G.F(+100.02)AGDDAPRAVFPSIVGRPRHQGVMVGMGQK(+100.02)D.S	99.4	38.44	3494.68	-9.4	874.67	4	69.05	2	Succinic anhydride labeling reagent light
tr|E9Q5F4|E9Q5F4_MOUSE	21	51	G.F(+100.02)AGDDAPRAVFPSIVGRPRHQGVMVGMGQK(+100.02)D.S	99.4	38.44	3494.68	-9.4	874.67	4	69.05	2	Succinic anhydride labeling reagent light
sp|Q62048|PEA15_MOUSE	49	75	F.L(+100.02)ESHNK(+100.02)LDK(+100.02)DNLSYIEHIFEISRRPDL.L	99.4	38.43	3580.73	1.5	896.192	4	81.13	3	Succinic anhydride labeling reagent light
tr|D3Z375|D3Z375_MOUSE	49	75	F.L(+100.02)ESHNK(+100.02)LDK(+100.02)DNLSYIEHIFEISRRPDL.L	99.4	38.43	3580.73	1.5	896.192	4	81.13	3	Succinic anhydride labeling reagent light
sp|P14152|MDHC_MOUSE	61	77	C.A(+104.04)LPLLQDVIATDK(+104.04)EEIA.F	95.2	38.34	2046.09	-8.7	1024.04	2	76.35	2	Succinic anhydride labeling reagent heavy (+4amu 4H2)
sp|P04370|MBP_MOUSE	153	168	T.M(+42.01)DHARHGFLPRHRDTG.I	99.6	38.27	1943.93	-30.4	486.975	4	39.86	0	Acetylation (N-term)
sp|Q9DB20|ATPO_MOUSE	24	33	P.F(+104.04)AK(+104.04)LVRPPVQ.V	99.3	38.22	1361.78	-3.3	681.895	2	78.81	2	Succinic anhydride labeling reagent heavy (+4amu 4H2)
sp|P60710|ACTB_MOUSE	169	178	G.Y(+100.02)ALPHAILRL.D	99.3	38.16	1265.71	-3.9	633.861	2	76.57	1	Succinic anhydride labeling reagent light
sp|Q9DB20|ATPO_MOUSE	24	42	P.F(+100.02)AK(+100.02)LVRPPVQVYGIEGRYA.T	99.6	38.16	2362.23	-26.4	788.397	3	59.31	2	Succinic anhydride labeling reagent light
tr|E9Q5F4|E9Q5F4_MOUSE	169	178	G.Y(+100.02)ALPHAILRL.D	99.3	38.16	1265.71	-3.9	633.861	2	76.57	1	Succinic anhydride labeling reagent light
sp|P14152|MDHC_MOUSE	2	17	M.S(+42.01)EPIRVLVTGAAGQIA.Y	99.3	38.12	1622.9	-5.5	812.452	2	76.79	0	Acetylation (N-term)
sp|P34884|MIF_MOUSE	83	94	G.L(+104.04)LSDRLHISPDR.V	99.3	38.02	1524.82	-10	509.276	3	65.37	1	Succinic anhydride labeling reagent heavy (+4amu 4H2)
sp|P04370|MBP_MOUSE	155	168	D.H(+104.04)ARHGFLPRHRDTG.I	99.3	37.63	1759.89	-12	440.975	4	41.89	1	Succinic anhydride labeling reagent heavy (+4amu 4H2)
sp|O54983|CRYM_MOUSE	35	60	F.S(+100.02)K(+100.02)GPDGGVM(+15.99)QPVRTVVPVAK(+100.02)HRGFLG.V	99.3	37.51	3004.51	-11.1	1002.5	3	64.82	3	Succinic anhydride labeling reagent light; Oxidation (M)
sp|P14152|MDHC_MOUSE	2	21	M.S(+42.01)EPIRVLVTGAAGQIAYSLL.Y	99.6	37.51	2099.16	-25.5	700.71	3	68.17	0	Acetylation (N-term)
sp|P99029|PRDX5_MOUSE	132	154	E.E(+100.02)WGRAHQAEGK(+100.02)VRLLADPTGAFG.K	99.3	37.29	2665.29	-4.1	889.433	3	72.56	2	Succinic anhydride labeling reagent light
tr|H3BJQ7|H3BJQ7_MOUSE	135	157	E.E(+100.02)WGRAHQAEGK(+100.02)VRLLADPTGAFG.K	99.3	37.29	2665.29	-4.1	889.433	3	72.56	2	Succinic anhydride labeling reagent light
sp|P62631|EF1A2_MOUSE	344	360	Q.V(+104.04)IILNHPGQISAGYSPV.I	99.3	37.25	1868	-4.7	935.002	2	76.84	1	Succinic anhydride labeling reagent heavy (+4amu 4H2)
sp|P14152|MDHC_MOUSE	286	306	L.Y(+100.02)SFPVVIK(+100.02)NK(+100.02)TWK(+100.02)FVEGLPIN.D	99.5	37.21	2878.43	-24.3	960.461	3	76.71	4	Succinic anhydride labeling reagent light
sp|P51881|ADT2_MOUSE	12	30	D.F(+100.02)LAGGVAAAISK(+100.02)TAVAPIE.R	99.5	37.21	1985.04	-23.9	993.501	2	70.36	2	Succinic anhydride labeling reagent light
sp|P60710|ACTB_MOUSE	8	40	A.LVVDNGSGMCKAGFAGDDAPRAVFPSIVGRPRH.Q	99.5	37.15	3395.7	-30.5	566.94	6	49.41	0
tr|E9Q5F4|E9Q5F4_MOUSE	8	40	A.LVVDNGSGMCKAGFAGDDAPRAVFPSIVGRPRH.Q	99.5	37.15	3395.7	-30.5	566.94	6	49.41	0
sp|P60710|ACTB_MOUSE	21	51	G.F(+104.04)AGDDAPRAVFPSIVGRPRHQGVMVGMGQK(+104.04)D.S	99.5	36.97	3502.73	-27.2	876.667	4	50.97	2	Succinic anhydride labeling reagent heavy (+4amu 4H2)
sp|P68033|ACTC_MOUSE	23	53	G.F(+104.04)AGDDAPRAVFPSIVGRPRHQGVMVGMGQK(+104.04)D.S	99.5	36.97	3502.73	-27.2	876.667	4	50.97	2	Succinic anhydride labeling reagent heavy (+4amu 4H2)
sp|P68134|ACTS_MOUSE	23	53	G.F(+104.04)AGDDAPRAVFPSIVGRPRHQGVMVGMGQK(+104.04)D.S	99.5	36.97	3502.73	-27.2	876.667	4	50.97	2	Succinic anhydride labeling reagent heavy (+4amu 4H2)
tr|E9Q5F4|E9Q5F4_MOUSE	21	51	G.F(+104.04)AGDDAPRAVFPSIVGRPRHQGVMVGMGQK(+104.04)D.S	99.5	36.97	3502.73	-27.2	876.667	4	50.97	2	Succinic anhydride labeling reagent heavy (+4amu 4H2)
sp|P04370|MBP_MOUSE	154	168	M.DHARHGFLPRHRDTG.I	99.2	36.87	1770.88	-11.9	443.721	4	40.49	0
sp|P14152|MDHC_MOUSE	224	256	F.I(+104.04)TTVQQRGAAVIK(+104.04)ARK(+104.04)LSSAMSAAK(+104.04)AIADHIRD.I	99.2	36.83	3893.1	-1.6	974.281	4	85.44	4	Succinic anhydride labeling reagent heavy (+4amu 4H2)
sp|P04370|MBP_MOUSE	154	171	M.D(+100.02)HARHGFLPRHRDTGILD.S	99.5	36.72	2212.09	-29.3	554.013	4	42.68	1	Succinic anhydride labeling reagent light
sp|Q99LX0|PARK7_MOUSE	167	184	L.A(+104.04)IVEALVGK(+104.04)DMANQVK(+104.04)AP.L	96.4	36.55	2165.13	-10.9	1083.56	2	68.83	3	Succinic anhydride labeling reagent heavy (+4amu 4H2)
sp|P48962|ADT1_MOUSE	100	111	F.L(+100.02)GGVDRHK(+100.02)QFWR.Y	99.2	36.46	1697.83	-10.8	566.944	3	64.52	2	Succinic anhydride labeling reagent light
sp|P01942|HBA_MOUSE	34	47	M.F(+104.04)ASFPTTK(+104.04)TYFPHF.D	99.2	36.45	1897.9	-0.8	949.957	2	86.33	2	Succinic anhydride labeling reagent heavy (+4amu 4H2)
tr|Q91VB8|Q91VB8_MOUSE	34	47	M.F(+104.04)ASFPTTK(+104.04)TYFPHF.D	99.2	36.45	1897.9	-0.8	949.957	2	86.33	2	Succinic anhydride labeling reagent heavy (+4amu 4H2)
sp|P04370|MBP_MOUSE	155	166	D.H(+104.04)ARHGFLPRHRD.T	99.2	36.37	1601.82	-9.9	401.459	4	41.7	1	Succinic anhydride labeling reagent heavy (+4amu 4H2)
sp|Q08890|IDS_MOUSE	38	54	D.A(+100.02)LNILLIIVDDLRPSLG.C	99.2	36.32	1934.11	-5.7	968.056	2	122.74	1	Succinic anhydride labeling reagent light
sp|P48962|ADT1_MOUSE	13	34	F.L(+100.02)AGGIAAAVSK(+100.02)TAVAPIERVK(+100.02)L.L	96.4	36.19	2434.33	-14.2	812.44	3	66.6	3	Succinic anhydride labeling reagent light
sp|P99029|PRDX5_MOUSE	129	154	F.V(+104.04)IEEWGRAHQAEGK(+104.04)VRLLADPTGAFG.K	99.2	36.19	3014.53	-2.2	1005.85	3	78.83	2	Succinic anhydride labeling reagent heavy (+4amu 4H2)
tr|H3BJQ7|H3BJQ7_MOUSE	132	157	F.V(+104.04)IEEWGRAHQAEGK(+104.04)VRLLADPTGAFG.K	99.2	36.19	3014.53	-2.2	1005.85	3	78.83	2	Succinic anhydride labeling reagent heavy (+4amu 4H2)
sp|P14152|MDHC_MOUSE	227	255	T.V(+100.02)QQRGAAVIK(+100.02)ARK(+100.02)LSSAMSAAK(+100.02)AIADHIR.D	99.2	36.18	3446.79	-2.1	862.704	4	84.47	4	Succinic anhydride labeling reagent light
sp|Q8CAY6|THIC_MOUSE	367	378	L.L(+100.02)HTLERVGGTRG.V	99.2	36.13	1394.73	-9.1	465.912	3	60.13	1	Succinic anhydride labeling reagent light
tr|G3XA25|G3XA25_MOUSE	335	346	L.L(+100.02)HTLERVGGTRG.V	99.2	36.13	1394.73	-9.1	465.912	3	60.13	1	Succinic anhydride labeling reagent light
tr|Q80X81|Q80X81_MOUSE	367	378	L.L(+100.02)HTLERVGGTRG.V	99.2	36.13	1394.73	-9.1	465.912	3	60.13	1	Succinic anhydride labeling reagent light
sp|Q9JIG8|PRAF2_MOUSE	2	10	M.S(+42.01)EVRLPPLR.A	99.2	36.09	1107.64	-9.1	554.822	2	62.36	0	Acetylation (N-term)
sp|P48962|ADT1_MOUSE	12	35	D.F(+104.04)LAGGIAAAVSK(+104.04)TAVAPIERVK(+104.04)LL.L	92.9	36.08	2706.56	-9.9	903.185	3	73.39	3	Succinic anhydride labeling reagent heavy (+4amu 4H2)
sp|Q62048|PEA15_MOUSE	34	75	S.E(+104.04)K(+104.04)SEEITTGSAWFSFLESHNK(+104.04)LDK(+104.04)DNLSYIEHIFEISRRPDL.L	99.3	36.08	5396.62	-3.9	900.441	6	59.52	4	Succinic anhydride labeling reagent heavy (+4amu 4H2)
tr|D3Z375|D3Z375_MOUSE	34	75	S.E(+104.04)K(+104.04)SEEITTGSAWFSFLESHNK(+104.04)LDK(+104.04)DNLSYIEHIFEISRRPDL.L	99.3	36.08	5396.62	-3.9	900.441	6	59.52	4	Succinic anhydride labeling reagent heavy (+4amu 4H2)
sp|P04370|MBP_MOUSE	153	167	T.M(+42.01)DHARHGFLPRHRDT.G	99.3	36.06	1886.91	-31.3	472.719	4	40	0	Acetylation (N-term)
sp|P68033|ACTC_MOUSE	55	90	S.Y(+100.02)VGDEAQSK(+100.02)RGILTLK(+100.02)YPIEHGIITNWDDMEK(+100.02)IWHH.T	99.3	35.98	4692.21	-18.5	939.432	5	64.9	4	Succinic anhydride labeling reagent light
sp|P68134|ACTS_MOUSE	55	90	S.Y(+100.02)VGDEAQSK(+100.02)RGILTLK(+100.02)YPIEHGIITNWDDMEK(+100.02)IWHH.T	99.3	35.98	4692.21	-18.5	939.432	5	64.9	4	Succinic anhydride labeling reagent light
sp|P51881|ADT2_MOUSE	9	30	F.A(+100.02)K(+100.02)DFLAGGVAAAISK(+100.02)TAVAPIE.R	99.3	35.89	2399.21	-22.1	1200.59	2	70.82	3	Succinic anhydride labeling reagent light
sp|P04370|MBP_MOUSE	150	168	T.ASTM(+15.99)DHARHGFLPRHRDTG.I	99.3	35.79	2177.03	-31.8	436.399	5	37.02	0	Oxidation (M)
tr|A8DUK4|A8DUK4_MOUSE	111	126	M.I(+100.02)VIVLGHHLGK(+100.02)DFTPA.A	99.1	35.72	1916	-2.6	959.007	2	86.17	2	Succinic anhydride labeling reagent light
sp|P60710|ACTB_MOUSE	21	51	G.F(+100.02)AGDDAPRAVFPSIVGRPRHQGVM(+15.99)VGM(+15.99)GQK(+100.02)D.S	99.1	35.68	3526.67	-7.4	882.669	4	65.88	2	Succinic anhydride labeling reagent light; Oxidation (M)
sp|P68033|ACTC_MOUSE	23	53	G.F(+100.02)AGDDAPRAVFPSIVGRPRHQGVM(+15.99)VGM(+15.99)GQK(+100.02)D.S	99.1	35.68	3526.67	-7.4	882.669	4	65.88	2	Succinic anhydride labeling reagent light; Oxidation (M)
sp|P68134|ACTS_MOUSE	23	53	G.F(+100.02)AGDDAPRAVFPSIVGRPRHQGVM(+15.99)VGM(+15.99)GQK(+100.02)D.S	99.1	35.68	3526.67	-7.4	882.669	4	65.88	2	Succinic anhydride labeling reagent light; Oxidation (M)
tr|E9Q5F4|E9Q5F4_MOUSE	21	51	G.F(+100.02)AGDDAPRAVFPSIVGRPRHQGVM(+15.99)VGM(+15.99)GQK(+100.02)D.S	99.1	35.68	3526.67	-7.4	882.669	4	65.88	2	Succinic anhydride labeling reagent light; Oxidation (M)
sp|P05064|ALDOA_MOUSE	2	29	M.PHPYPALTPEQK(+104.04)K(+104.04)ELSDIAHRIVAPGK(+104.04)G.I	99.1	35.58	3360.77	-4.6	841.197	4	75.96	3	Succinic anhydride labeling reagent heavy (+4amu 4H2)
tr|A6ZI44|A6ZI44_MOUSE	56	83	M.PHPYPALTPEQK(+104.04)K(+104.04)ELSDIAHRIVAPGK(+104.04)G.I	99.1	35.58	3360.77	-4.6	841.197	4	75.96	3	Succinic anhydride labeling reagent heavy (+4amu 4H2)
sp|P14152|MDHC_MOUSE	289	304	F.P(+104.04)VVIK(+104.04)NK(+104.04)TWK(+104.04)FVEGLP.I	92.1	35.47	2270.24	-8.3	1136.12	2	76.94	4	Succinic anhydride labeling reagent heavy (+4amu 4H2)
sp|Q08890|IDS_MOUSE	38	54	D.A(+104.04)LNILLIIVDDLRPSLG.C	99.1	35.38	1938.13	-5.4	970.069	2	122.67	1	Succinic anhydride labeling reagent heavy (+4amu 4H2)
sp|P04370|MBP_MOUSE	157	168	A.R(+100.02)HGFLPRHRDTG.I	99	35.32	1547.77	-8.4	387.947	4	44.9	1	Succinic anhydride labeling reagent light
sp|P04370|MBP_MOUSE	152	168	S.T(+104.04)MDHARHGFLPRHRDTG.I	99	35.3	2107.01	-13.9	527.752	4	48.02	1	Succinic anhydride labeling reagent heavy (+4amu 4H2)
sp|O35098|DPYL4_MOUSE	1	30	M(+104.04)(+15.99)SFQGKK(+42.01)SIPRITSDRLLIK(+104.04)GGK(+104.04)IVNDDQS.F	99.2	35.23	3700.94	-23.1	1234.62	3	54.07	3	Succinic anhydride labeling reagent heavy (+4amu 4H2); Oxidation (M); Acetylation (K)
tr|Q3TMU8|Q3TMU8_MOUSE	1	30	M(+104.04)(+15.99)SFQGKK(+42.01)SIPRITSDRLLIK(+104.04)GGK(+104.04)IVNDDQS.F	99.2	35.23	3700.94	-23.1	1234.62	3	54.07	3	Succinic anhydride labeling reagent heavy (+4amu 4H2); Oxidation (M); Acetylation (K)
sp|Q03265|ATPA_MOUSE	76	89	L.S(+104.04)IGDGIARVHGLRN.V	98.9	35.22	1567.84	-9.3	523.615	3	59.73	1	Succinic anhydride labeling reagent heavy (+4amu 4H2)
tr|D3Z6F5|D3Z6F5_MOUSE	26	39	L.S(+104.04)IGDGIARVHGLRN.V	98.9	35.22	1567.84	-9.3	523.615	3	59.73	1	Succinic anhydride labeling reagent heavy (+4amu 4H2)
sp|Q9DB20|ATPO_MOUSE	75	104	V.SLAVLNPYIKRTVK(+100.02)VK(+100.02)SLNDITK(+100.02)REK(+100.02)FSPL.T	99.2	35.21	3857.08	-46.5	965.233	4	61.38	4	Succinic anhydride labeling reagent light
sp|P60710|ACTB_MOUSE	169	177	G.Y(+100.02)ALPHAILR.L	98.9	35.16	1152.63	-8.6	577.317	2	67.67	1	Succinic anhydride labeling reagent light
tr|E9Q5F4|E9Q5F4_MOUSE	169	177	G.Y(+100.02)ALPHAILR.L	98.9	35.16	1152.63	-8.6	577.317	2	67.67	1	Succinic anhydride labeling reagent light
sp|P08249|MDHM_MOUSE	43	54	L.L(+100.02)LK(+100.02)NSPLVSRLT.L	99.2	35.1	1539.85	-24.9	770.913	2	59.8	2	Succinic anhydride labeling reagent light
sp|P56480|ATPB_MOUSE	50	72	Q.A(+100.02)SAAPK(+100.02)AGTATGRIVAVIGAVVD.V	98.7	34.97	2294.21	-3	1148.11	2	84.85	2	Succinic anhydride labeling reagent light
sp|P60710|ACTB_MOUSE	21	51	G.F(+104.04)AGDDAPRAVFPSIVGRPRHQGVM(+15.99)VGM(+15.99)GQK(+104.04)D.S	99.2	34.76	3534.72	-27.2	884.664	4	49.03	2	Succinic anhydride labeling reagent heavy (+4amu 4H2); Oxidation (M)
sp|P68033|ACTC_MOUSE	23	53	G.F(+104.04)AGDDAPRAVFPSIVGRPRHQGVM(+15.99)VGM(+15.99)GQK(+104.04)D.S	99.2	34.76	3534.72	-27.2	884.664	4	49.03	2	Succinic anhydride labeling reagent heavy (+4amu 4H2); Oxidation (M)
sp|P68134|ACTS_MOUSE	23	53	G.F(+104.04)AGDDAPRAVFPSIVGRPRHQGVM(+15.99)VGM(+15.99)GQK(+104.04)D.S	99.2	34.76	3534.72	-27.2	884.664	4	49.03	2	Succinic anhydride labeling reagent heavy (+4amu 4H2); Oxidation (M)
tr|E9Q5F4|E9Q5F4_MOUSE	21	51	G.F(+104.04)AGDDAPRAVFPSIVGRPRHQGVM(+15.99)VGM(+15.99)GQK(+104.04)D.S	99.2	34.76	3534.72	-27.2	884.664	4	49.03	2	Succinic anhydride labeling reagent heavy (+4amu 4H2); Oxidation (M)
sp|P99029|PRDX5_MOUSE	129	155	F.V(+100.02)IEEWGRAHQAEGK(+100.02)VRLLADPTGAFGK(+100.02).A	98.6	34.69	3234.59	-1.7	1079.2	3	78.74	3	Succinic anhydride labeling reagent light
tr|H3BJQ7|H3BJQ7_MOUSE	132	158	F.V(+100.02)IEEWGRAHQAEGK(+100.02)VRLLADPTGAFGK(+100.02).A	98.6	34.69	3234.59	-1.7	1079.2	3	78.74	3	Succinic anhydride labeling reagent light
sp|Q61548|AP180_MOUSE	73	91	W.V(+104.04)VVFK(+104.04)ALVTTHHLMVHGNE.R	98.6	34.58	2338.22	-3.9	780.412	3	87.79	2	Succinic anhydride labeling reagent heavy (+4amu 4H2)
tr|E9Q9A3|E9Q9A3_MOUSE	73	91	W.V(+104.04)VVFK(+104.04)ALVTTHHLMVHGNE.R	98.6	34.58	2338.22	-3.9	780.412	3	87.79	2	Succinic anhydride labeling reagent heavy (+4amu 4H2)
tr|E9QLK9|E9QLK9_MOUSE	73	91	W.V(+104.04)VVFK(+104.04)ALVTTHHLMVHGNE.R	98.6	34.58	2338.22	-3.9	780.412	3	87.79	2	Succinic anhydride labeling reagent heavy (+4amu 4H2)
tr|E9QQ05|E9QQ05_MOUSE	73	91	W.V(+104.04)VVFK(+104.04)ALVTTHHLMVHGNE.R	98.6	34.58	2338.22	-3.9	780.412	3	87.79	2	Succinic anhydride labeling reagent heavy (+4amu 4H2)
tr|Q3TWS4|Q3TWS4_MOUSE	73	91	W.V(+104.04)VVFK(+104.04)ALVTTHHLMVHGNE.R	98.6	34.58	2338.22	-3.9	780.412	3	87.79	2	Succinic anhydride labeling reagent heavy (+4amu 4H2)
tr|Q8BQA2|Q8BQA2_MOUSE	73	91	W.V(+104.04)VVFK(+104.04)ALVTTHHLMVHGNE.R	98.6	34.58	2338.22	-3.9	780.412	3	87.79	2	Succinic anhydride labeling reagent heavy (+4amu 4H2)
sp|P04370|MBP_MOUSE	154	168	M.D(+100.02)HARHGFLPRHRDTG.I	99.2	34.51	1870.89	-31	375.174	5	38.13	1	Succinic anhydride labeling reagent light
sp|Q60829|PPR1B_MOUSE	1	24	M(+100.02)DPK(+42.01)DRK(+100.02)K(+100.02)IQFSVPAPPSQLDPRQ.V	98.6	34.44	3119.52	-1.7	1040.85	3	71.73	3	Succinic anhydride labeling reagent light; Acetylation (K)
sp|P60710|ACTB_MOUSE	22	42	F.A(+104.04)GDDAPRAVFPSIVGRPRHQG.V	99.2	34.41	2306.18	-30.8	577.535	4	46.35	1	Succinic anhydride labeling reagent heavy (+4amu 4H2)
sp|P68033|ACTC_MOUSE	24	44	F.A(+104.04)GDDAPRAVFPSIVGRPRHQG.V	99.2	34.41	2306.18	-30.8	577.535	4	46.35	1	Succinic anhydride labeling reagent heavy (+4amu 4H2)
sp|P68134|ACTS_MOUSE	24	44	F.A(+104.04)GDDAPRAVFPSIVGRPRHQG.V	99.2	34.41	2306.18	-30.8	577.535	4	46.35	1	Succinic anhydride labeling reagent heavy (+4amu 4H2)
tr|E9Q5F4|E9Q5F4_MOUSE	22	42	F.A(+104.04)GDDAPRAVFPSIVGRPRHQG.V	99.2	34.41	2306.18	-30.8	577.535	4	46.35	1	Succinic anhydride labeling reagent heavy (+4amu 4H2)
sp|P60710|ACTB_MOUSE	21	52	G.F(+100.02)AGDDAPRAVFPSIVGRPRHQGVM(+15.99)VGM(+15.99)GQK(+100.02)DS.Y	99.2	34.32	3613.7	-26.4	904.409	4	48.92	2	Succinic anhydride labeling reagent light; Oxidation (M)
sp|P68033|ACTC_MOUSE	23	54	G.F(+100.02)AGDDAPRAVFPSIVGRPRHQGVM(+15.99)VGM(+15.99)GQK(+100.02)DS.Y	99.2	34.32	3613.7	-26.4	904.409	4	48.92	2	Succinic anhydride labeling reagent light; Oxidation (M)
sp|P68134|ACTS_MOUSE	23	54	G.F(+100.02)AGDDAPRAVFPSIVGRPRHQGVM(+15.99)VGM(+15.99)GQK(+100.02)DS.Y	99.2	34.32	3613.7	-26.4	904.409	4	48.92	2	Succinic anhydride labeling reagent light; Oxidation (M)
tr|E9Q5F4|E9Q5F4_MOUSE	21	52	G.F(+100.02)AGDDAPRAVFPSIVGRPRHQGVM(+15.99)VGM(+15.99)GQK(+100.02)DS.Y	99.2	34.32	3613.7	-26.4	904.409	4	48.92	2	Succinic anhydride labeling reagent light; Oxidation (M)
sp|P04370|MBP_MOUSE	150	167	T.ASTM(+15.99)DHARHGFLPRHRDT.G	99.2	34.11	2120.01	-32.2	424.995	5	37.18	0	Oxidation (M)
sp|P04370|MBP_MOUSE	154	166	M.D(+100.02)HARHGFLPRHRD.T	99.2	33.99	1712.82	-30	429.2	4	38.08	1	Succinic anhydride labeling reagent light
sp|Q03265|ATPA_MOUSE	76	89	L.S(+100.02)IGDGIARVHGLRN.V	98.5	33.96	1563.81	-9.4	522.273	3	59.8	1	Succinic anhydride labeling reagent light
tr|D3Z6F5|D3Z6F5_MOUSE	26	39	L.S(+100.02)IGDGIARVHGLRN.V	98.5	33.96	1563.81	-9.4	522.273	3	59.8	1	Succinic anhydride labeling reagent light
sp|P05202|AATM_MOUSE	402	430	Y.M(+100.02)TK(+100.02)DGRISVAGVTSGNVGYLAHAIHQVTK(+100.02)	98.5	33.95	3309.63	-3.3	1104.21	3	76.51	3	Succinic anhydride labeling reagent light
tr|Q91VA7|Q91VA7_MOUSE	303	323	F.E(+100.02)TGARHPFAQAVGRNIANPTA.M	98.5	33.91	2277.12	-11.4	760.04	3	57.71	1	Succinic anhydride labeling reagent light
sp|P60710|ACTB_MOUSE	21	40	G.F(+100.02)AGDDAPRAVFPSIVGRPRH.Q	98.5	33.81	2264.14	-9.5	755.715	3	66.37	1	Succinic anhydride labeling reagent light
sp|P68033|ACTC_MOUSE	23	42	G.F(+100.02)AGDDAPRAVFPSIVGRPRH.Q	98.5	33.81	2264.14	-9.5	755.715	3	66.37	1	Succinic anhydride labeling reagent light
sp|P68134|ACTS_MOUSE	23	42	G.F(+100.02)AGDDAPRAVFPSIVGRPRH.Q	98.5	33.81	2264.14	-9.5	755.715	3	66.37	1	Succinic anhydride labeling reagent light
tr|E9Q5F4|E9Q5F4_MOUSE	21	40	G.F(+100.02)AGDDAPRAVFPSIVGRPRH.Q	98.5	33.81	2264.14	-9.5	755.715	3	66.37	1	Succinic anhydride labeling reagent light
sp|Q99LX0|PARK7_MOUSE	167	187	L.A(+100.02)IVEALVGK(+100.02)DM(+15.99)ANQVK(+100.02)APLVL.K	82.8	33.77	2494.29	-15.8	832.423	3	71.13	3	Succinic anhydride labeling reagent light; Oxidation (M)
sp|P68033|ACTC_MOUSE	55	89	S.Y(+104.04)VGDEAQSK(+104.04)RGILTLK(+104.04)YPIEHGIITNWDDMEK(+104.04)IWH.H	99	33.67	4571.25	-21	1143.8	4	65.73	4	Succinic anhydride labeling reagent heavy (+4amu 4H2)
sp|P68134|ACTS_MOUSE	55	89	S.Y(+104.04)VGDEAQSK(+104.04)RGILTLK(+104.04)YPIEHGIITNWDDMEK(+104.04)IWH.H	99	33.67	4571.25	-21	1143.8	4	65.73	4	Succinic anhydride labeling reagent heavy (+4amu 4H2)
tr|Q91VB8|Q91VB8_MOUSE	48	87	F.D(+100.02)VSHGSAQVK(+100.02)GHGK(+100.02)K(+100.02)VADALANAAGHLDDLPGALSALSDL.H	98.9	33.47	4305.07	-21.7	1077.25	4	64.52	4	Succinic anhydride labeling reagent light
sp|P68033|ACTC_MOUSE	55	91	S.Y(+100.02)VGDEAQSK(+100.02)RGILTLK(+100.02)YPIEHGIITNWDDMEK(+100.02)IWHHT.F	98.9	33.45	4793.26	-24.3	1199.29	4	65.39	4	Succinic anhydride labeling reagent light
sp|P68134|ACTS_MOUSE	55	91	S.Y(+100.02)VGDEAQSK(+100.02)RGILTLK(+100.02)YPIEHGIITNWDDMEK(+100.02)IWHHT.F	98.9	33.45	4793.26	-24.3	1199.29	4	65.39	4	Succinic anhydride labeling reagent light
sp|Q60829|PPR1B_MOUSE	1	24	M(+104.04)DPK(+42.01)DRK(+104.04)K(+104.04)IQFSVPAPPSQLDPRQ.V	98.9	33.44	3131.6	-25.2	1044.85	3	52.78	3	Succinic anhydride labeling reagent heavy (+4amu 4H2); Acetylation (K)
sp|P16858|G3P_MOUSE	231	243	A.F(+100.02)RVPTPNVSVVDL.T	98	33.39	1541.81	-2.7	771.91	2	79.51	1	Succinic anhydride labeling reagent light
sp|Q64467|G3PT_MOUSE	337	349	A.F(+100.02)RVPTPNVSVVDL.T	98	33.39	1541.81	-2.7	771.91	2	79.51	1	Succinic anhydride labeling reagent light
tr|S4R1W1|S4R1W1_MOUSE	231	243	A.F(+100.02)RVPTPNVSVVDL.T	98	33.39	1541.81	-2.7	771.91	2	79.51	1	Succinic anhydride labeling reagent light
tr|S4R257|S4R257_MOUSE	188	200	A.F(+100.02)RVPTPNVSVVDL.T	98	33.39	1541.81	-2.7	771.91	2	79.51	1	Succinic anhydride labeling reagent light
tr|S4R2G5|S4R2G5_MOUSE	337	349	A.F(+100.02)RVPTPNVSVVDL.T	98	33.39	1541.81	-2.7	771.91	2	79.51	1	Succinic anhydride labeling reagent light
sp|Q9D3D9|ATPD_MOUSE	71	92	L.A(+104.04)SHVPTLQVLRPGLVVVHTEDG.T	98.9	33.33	2427.31	-26.5	810.088	3	51.98	1	Succinic anhydride labeling reagent heavy (+4amu 4H2)
tr|D3Z7S4|D3Z7S4_MOUSE	71	92	L.A(+104.04)SHVPTLQVLRPGLVVVHTEDG.T	98.9	33.33	2427.31	-26.5	810.088	3	51.98	1	Succinic anhydride labeling reagent heavy (+4amu 4H2)
sp|P05213|TBA1B_MOUSE	259	270	N.L(+104.04)VPYPRIHFPLA.T	97.9	33.24	1525.86	-2.1	763.935	2	79.42	1	Succinic anhydride labeling reagent heavy (+4amu 4H2)
sp|P05214|TBA3_MOUSE	259	270	N.L(+104.04)VPYPRIHFPLA.T	97.9	33.24	1525.86	-2.1	763.935	2	79.42	1	Succinic anhydride labeling reagent heavy (+4amu 4H2)
sp|P68368|TBA4A_MOUSE	259	270	N.L(+104.04)VPYPRIHFPLA.T	97.9	33.24	1525.86	-2.1	763.935	2	79.42	1	Succinic anhydride labeling reagent heavy (+4amu 4H2)
sp|P68369|TBA1A_MOUSE	259	270	N.L(+104.04)VPYPRIHFPLA.T	97.9	33.24	1525.86	-2.1	763.935	2	79.42	1	Succinic anhydride labeling reagent heavy (+4amu 4H2)
sp|P68373|TBA1C_MOUSE	259	270	N.L(+104.04)VPYPRIHFPLA.T	97.9	33.24	1525.86	-2.1	763.935	2	79.42	1	Succinic anhydride labeling reagent heavy (+4amu 4H2)
sp|Q9R0P9|UCHL1_MOUSE	51	62	L.L(+100.02)LFPLTAQHENF.R	98.9	33.15	1528.76	-23	765.368	2	64.17	1	Succinic anhydride labeling reagent light
sp|P60710|ACTB_MOUSE	21	42	G.F(+100.02)AGDDAPRAVFPSIVGRPRHQG.V	97.7	33	2449.23	-9.3	817.408	3	65.29	1	Succinic anhydride labeling reagent light
sp|P68033|ACTC_MOUSE	23	44	G.F(+100.02)AGDDAPRAVFPSIVGRPRHQG.V	97.7	33	2449.23	-9.3	817.408	3	65.29	1	Succinic anhydride labeling reagent light
sp|P68134|ACTS_MOUSE	23	44	G.F(+100.02)AGDDAPRAVFPSIVGRPRHQG.V	97.7	33	2449.23	-9.3	817.408	3	65.29	1	Succinic anhydride labeling reagent light
tr|E9Q5F4|E9Q5F4_MOUSE	21	42	G.F(+100.02)AGDDAPRAVFPSIVGRPRHQG.V	97.7	33	2449.23	-9.3	817.408	3	65.29	1	Succinic anhydride labeling reagent light
sp|P04370|MBP_MOUSE	155	168	D.H(+100.02)ARHGFLPRHRDTG.I	98.9	32.91	1755.87	-30.5	439.961	4	37.42	1	Succinic anhydride labeling reagent light
sp|P60710|ACTB_MOUSE	21	46	G.F(+100.02)AGDDAPRAVFPSIVGRPRHQGVMVG.M	97.6	32.71	2835.42	-8.8	709.857	4	67.88	1	Succinic anhydride labeling reagent light
sp|P68033|ACTC_MOUSE	23	48	G.F(+100.02)AGDDAPRAVFPSIVGRPRHQGVMVG.M	97.6	32.71	2835.42	-8.8	709.857	4	67.88	1	Succinic anhydride labeling reagent light
sp|P68134|ACTS_MOUSE	23	48	G.F(+100.02)AGDDAPRAVFPSIVGRPRHQGVMVG.M	97.6	32.71	2835.42	-8.8	709.857	4	67.88	1	Succinic anhydride labeling reagent light
tr|E9Q5F4|E9Q5F4_MOUSE	21	46	G.F(+100.02)AGDDAPRAVFPSIVGRPRHQGVMVG.M	97.6	32.71	2835.42	-8.8	709.857	4	67.88	1	Succinic anhydride labeling reagent light
sp|Q60829|PPR1B_MOUSE	1	24	M(+42.01)(+15.99)DPK(+104.04)DRK(+104.04)K(+104.04)IQFSVPAPPSQLDPRQ.V	98.8	32.66	3147.59	-26.1	1050.18	3	51.16	3	Acetylation (N-term); Oxidation (M); Succinic anhydride labeling reagent heavy (+4amu 4H2)
sp|P51881|ADT2_MOUSE	13	30	F.L(+100.02)AGGVAAAISK(+100.02)TAVAPIE.R	97.6	32.62	1837.97	1.4	919.992	2	88.26	2	Succinic anhydride labeling reagent light
sp|P17742|PPIA_MOUSE	117	164	T.A(+100.02)K(+100.02)TEWLDGK(+100.02)HVVFGK(+100.02)VKEGMNIVEAMERFGSRNGKTSKKITISDCGQL	98.8	32.49	5721.81	-45.5	1145.32	5	73.32	4	Succinic anhydride labeling reagent light
sp|P04370|MBP_MOUSE	153	166	T.M(+42.01)(+15.99)DHARHGFLPRHRD.T	97.5	32.48	1801.85	-11.4	451.466	4	42.93	0	Acetylation (N-term); Oxidation (M)
sp|P04370|MBP_MOUSE	153	168	T.M(+15.99)DHARHGFLPRHRDTG.I	97.5	32.44	1917.91	-13.6	480.479	4	40.37	0	Oxidation (M)
sp|P05202|AATM_MOUSE	402	429	Y.M(+100.02)TK(+100.02)DGRISVAGVTSGNVGYLAHAIHQVT.K	97.5	32.4	3081.52	-2.8	1028.18	3	75.33	2	Succinic anhydride labeling reagent light
sp|P97807|FUMH_MOUSE	270	308	L.A(+104.04)AGGTAVGTGLNTRIGFAEK(+104.04)VAAK(+104.04)VAALTGLPFVTAPNK(+104.04).F	98.8	32.17	4155.24	-24.6	1039.79	4	74.52	4	Succinic anhydride labeling reagent heavy (+4amu 4H2)
sp|P04370|MBP_MOUSE	153	168	T.MDHARHGFLPRHRDTG.I	98.8	32.1	1901.92	-30.7	476.472	4	37.16	0
sp|Q91VR2|ATPG_MOUSE	130	148	M.I(+100.02)VGVGEK(+100.02)IK(+100.02)GILYRTHSDQ.F	98.7	32.01	2412.22	-24.4	805.06	3	69.13	3	Succinic anhydride labeling reagent light
tr|A2AKU9|A2AKU9_MOUSE	130	148	M.I(+100.02)VGVGEK(+100.02)IK(+100.02)GILYRTHSDQ.F	98.7	32.01	2412.22	-24.4	805.06	3	69.13	3	Succinic anhydride labeling reagent light
tr|A2AKV1|A2AKV1_MOUSE	106	124	M.I(+100.02)VGVGEK(+100.02)IK(+100.02)GILYRTHSDQ.F	98.7	32.01	2412.22	-24.4	805.06	3	69.13	3	Succinic anhydride labeling reagent light
tr|A2AKV2|A2AKV2_MOUSE	106	124	M.I(+100.02)VGVGEK(+100.02)IK(+100.02)GILYRTHSDQ.F	98.7	32.01	2412.22	-24.4	805.06	3	69.13	3	Succinic anhydride labeling reagent light
tr|A2AKV3|A2AKV3_MOUSE	106	124	M.I(+100.02)VGVGEK(+100.02)IK(+100.02)GILYRTHSDQ.F	98.7	32.01	2412.22	-24.4	805.06	3	69.13	3	Succinic anhydride labeling reagent light
tr|Q8C2Q8|Q8C2Q8_MOUSE	106	124	M.I(+100.02)VGVGEK(+100.02)IK(+100.02)GILYRTHSDQ.F	98.7	32.01	2412.22	-24.4	805.06	3	69.13	3	Succinic anhydride labeling reagent light
sp|P16858|G3P_MOUSE	231	240	A.F(+104.04)RVPTPNVSV.V	98.7	31.97	1218.65	-28.4	610.317	2	53.18	1	Succinic anhydride labeling reagent heavy (+4amu 4H2)
sp|Q64467|G3PT_MOUSE	337	346	A.F(+104.04)RVPTPNVSV.V	98.7	31.97	1218.65	-28.4	610.317	2	53.18	1	Succinic anhydride labeling reagent heavy (+4amu 4H2)
tr|S4R1W1|S4R1W1_MOUSE	231	240	A.F(+104.04)RVPTPNVSV.V	98.7	31.97	1218.65	-28.4	610.317	2	53.18	1	Succinic anhydride labeling reagent heavy (+4amu 4H2)
tr|S4R257|S4R257_MOUSE	188	197	A.F(+104.04)RVPTPNVSV.V	98.7	31.97	1218.65	-28.4	610.317	2	53.18	1	Succinic anhydride labeling reagent heavy (+4amu 4H2)
tr|S4R2G5|S4R2G5_MOUSE	337	346	A.F(+104.04)RVPTPNVSV.V	98.7	31.97	1218.65	-28.4	610.317	2	53.18	1	Succinic anhydride labeling reagent heavy (+4amu 4H2)
sp|P97427|DPYL1_MOUSE	540	567	F.S(+104.04)LSGAQIDDNNPRRTGHRIVAPPGGRSN.I	97.5	31.91	3045.54	-14.6	762.381	4	52	1	Succinic anhydride labeling reagent heavy (+4amu 4H2)
tr|Q6P1J1|Q6P1J1_MOUSE	654	681	F.S(+104.04)LSGAQIDDNNPRRTGHRIVAPPGGRSN.I	97.5	31.91	3045.54	-14.6	762.381	4	52	1	Succinic anhydride labeling reagent heavy (+4amu 4H2)
sp|O08553|DPYL2_MOUSE	546	567	Q.I(+104.04)DDNIPRRTTQRIVAPPGGRAN.I	97.5	31.89	2520.35	-13.7	631.085	4	56.16	1	Succinic anhydride labeling reagent heavy (+4amu 4H2)
sp|O08553|DPYL2_MOUSE	186	201	L.S(+100.02)VIRDIGAIAQVHAEN.G	98.1	31.54	1791.91	-29.5	598.293	3	55.62	1	Succinic anhydride labeling reagent light
sp|Q8K0T0|RTN1_MOUSE	764	778	T.V(+100.02)VAK(+100.02)IQAK(+100.02)IPGAK(+100.02)RH.A	97.4	31.5	2015.07	-4.4	1008.54	2	78.12	4	Succinic anhydride labeling reagent light
tr|A3QM89|A3QM89_MOUSE	237	251	T.V(+100.02)VAK(+100.02)IQAK(+100.02)IPGAK(+100.02)RH.A	97.4	31.5	2015.07	-4.4	1008.54	2	78.12	4	Succinic anhydride labeling reagent light
tr|Q7M6W1|Q7M6W1_MOUSE	192	206	T.V(+100.02)VAK(+100.02)IQAK(+100.02)IPGAK(+100.02)RH.A	97.4	31.5	2015.07	-4.4	1008.54	2	78.12	4	Succinic anhydride labeling reagent light
tr|Q91VA7|Q91VA7_MOUSE	371	384	D.F(+100.02)IK(+100.02)SVIGHLHPHGG	97.4	31.48	1697.85	-0.5	566.958	3	80.81	2	Succinic anhydride labeling reagent light
sp|P05202|AATM_MOUSE	402	429	Y.M(+104.04)TK(+104.04)DGRISVAGVTSGNVGYLAHAIHQVT.K	97.4	31.38	3089.57	-2.7	1030.86	3	75.28	2	Succinic anhydride labeling reagent heavy (+4amu 4H2)
sp|P60710|ACTB_MOUSE	32	46	F.P(+100.02)SIVGRPRHQGVMVG.M	97.3	31.29	1688.88	-11.9	563.96	3	58.22	1	Succinic anhydride labeling reagent light
sp|P68033|ACTC_MOUSE	34	48	F.P(+100.02)SIVGRPRHQGVMVG.M	97.3	31.29	1688.88	-11.9	563.96	3	58.22	1	Succinic anhydride labeling reagent light
sp|P68134|ACTS_MOUSE	34	48	F.P(+100.02)SIVGRPRHQGVMVG.M	97.3	31.29	1688.88	-11.9	563.96	3	58.22	1	Succinic anhydride labeling reagent light
tr|E9Q5F4|E9Q5F4_MOUSE	32	46	F.P(+100.02)SIVGRPRHQGVMVG.M	97.3	31.29	1688.88	-11.9	563.96	3	58.22	1	Succinic anhydride labeling reagent light
sp|Q9R0P9|UCHL1_MOUSE	50	62	L.L(+100.02)LLFPLTAQHENF.R	97.3	31.19	1641.84	-3.8	821.924	2	94.2	1	Succinic anhydride labeling reagent light
sp|Q9D3D9|ATPD_MOUSE	71	84	L.A(+104.04)SHVPTLQVLRPGL.V	97.3	31.18	1590.9	-8.9	796.452	2	70.6	1	Succinic anhydride labeling reagent heavy (+4amu 4H2)
tr|D3Z7S4|D3Z7S4_MOUSE	71	84	L.A(+104.04)SHVPTLQVLRPGL.V	97.3	31.18	1590.9	-8.9	796.452	2	70.6	1	Succinic anhydride labeling reagent heavy (+4amu 4H2)
sp|P04370|MBP_MOUSE	154	166	M.DHARHGFLPRHRD.T	97.3	31.15	1612.81	-10.2	404.205	4	47.56	0
sp|P04370|MBP_MOUSE	155	167	D.H(+104.04)ARHGFLPRHRDT.G	97.3	31.1	1702.87	-11.3	426.72	4	42.03	1	Succinic anhydride labeling reagent heavy (+4amu 4H2)
sp|P17751|TPIS_MOUSE	220	244	W.A(+100.02)IGTGK(+100.02)TATPQQAQEVHEK(+100.02)LRGWLK(+100.02).S	98	31.07	3146.55	-23.1	1049.83	3	55.13	4	Succinic anhydride labeling reagent light
tr|H7BXC3|H7BXC3_MOUSE	88	112	W.A(+100.02)IGTGK(+100.02)TATPQQAQEVHEK(+100.02)LRGWLK(+100.02).S	98	31.07	3146.55	-23.1	1049.83	3	55.13	4	Succinic anhydride labeling reagent light
sp|P60710|ACTB_MOUSE	21	51	G.F(+100.02)AGDDAPRAVFPSIVGRPRHQGVMVGM(+15.99)GQK(+100.02)D.S	97.3	31.02	3510.68	-7.5	878.67	4	67.27	2	Succinic anhydride labeling reagent light; Oxidation (M)
sp|P68033|ACTC_MOUSE	23	53	G.F(+100.02)AGDDAPRAVFPSIVGRPRHQGVMVGM(+15.99)GQK(+100.02)D.S	97.3	31.02	3510.68	-7.5	878.67	4	67.27	2	Succinic anhydride labeling reagent light; Oxidation (M)
sp|P68134|ACTS_MOUSE	23	53	G.F(+100.02)AGDDAPRAVFPSIVGRPRHQGVMVGM(+15.99)GQK(+100.02)D.S	97.3	31.02	3510.68	-7.5	878.67	4	67.27	2	Succinic anhydride labeling reagent light; Oxidation (M)
tr|E9Q5F4|E9Q5F4_MOUSE	21	51	G.F(+100.02)AGDDAPRAVFPSIVGRPRHQGVMVGM(+15.99)GQK(+100.02)D.S	97.3	31.02	3510.68	-7.5	878.67	4	67.27	2	Succinic anhydride labeling reagent light; Oxidation (M)
sp|Q9DB20|ATPO_MOUSE	75	104	V.SLAVLNPYIK(+100.02)RTVKVK(+100.02)SLNDITK(+100.02)REK(+100.02)FSPL.T	98	30.88	3857.08	-45	1286.64	3	61.4	4	Succinic anhydride labeling reagent light
sp|P99029|PRDX5_MOUSE	132	154	E.E(+104.04)WGRAHQAEGK(+104.04)VRLLADPTGAFG.K	97.2	30.86	2673.34	-5.2	892.115	3	72.47	2	Succinic anhydride labeling reagent heavy (+4amu 4H2)
tr|H3BJQ7|H3BJQ7_MOUSE	135	157	E.E(+104.04)WGRAHQAEGK(+104.04)VRLLADPTGAFG.K	97.2	30.86	2673.34	-5.2	892.115	3	72.47	2	Succinic anhydride labeling reagent heavy (+4amu 4H2)
sp|P60710|ACTB_MOUSE	21	39	G.F(+104.04)AGDDAPRAVFPSIVGRPR.H	98	30.73	2131.11	-29.3	711.357	3	51.01	1	Succinic anhydride labeling reagent heavy (+4amu 4H2)
sp|P68033|ACTC_MOUSE	23	41	G.F(+104.04)AGDDAPRAVFPSIVGRPR.H	98	30.73	2131.11	-29.3	711.357	3	51.01	1	Succinic anhydride labeling reagent heavy (+4amu 4H2)
sp|P68134|ACTS_MOUSE	23	41	G.F(+104.04)AGDDAPRAVFPSIVGRPR.H	98	30.73	2131.11	-29.3	711.357	3	51.01	1	Succinic anhydride labeling reagent heavy (+4amu 4H2)
tr|E9Q5F4|E9Q5F4_MOUSE	21	39	G.F(+104.04)AGDDAPRAVFPSIVGRPR.H	98	30.73	2131.11	-29.3	711.357	3	51.01	1	Succinic anhydride labeling reagent heavy (+4amu 4H2)
sp|P14152|MDHC_MOUSE	227	255	T.V(+104.04)QQRGAAVIK(+104.04)ARK(+104.04)LSSAMSAAK(+104.04)AIADHIR.D	97.1	30.6	3462.89	-2.2	866.729	4	84.31	4	Succinic anhydride labeling reagent heavy (+4amu 4H2)
sp|Q99LX0|PARK7_MOUSE	167	185	L.A(+104.04)IVEALVGK(+104.04)DMANQVK(+104.04)APL.V	71.6	30.6	2278.22	-12.1	1140.1	2	71.09	3	Succinic anhydride labeling reagent heavy (+4amu 4H2)
sp|P04370|MBP_MOUSE	143	164	Q.R(+104.04)SKYLATASTM(+15.99)DHARHGFLPRH.R	97.9	30.59	2671.33	-33.9	535.256	5	42.26	1	Oxidation (M); Succinic anhydride labeling reagent heavy (+4amu 4H2)
tr|Q91VA7|Q91VA7_MOUSE	372	384	F.I(+100.02)K(+100.02)SVIGHLHPHGG	97.1	30.56	1550.78	-4.7	517.933	3	72.42	2	Succinic anhydride labeling reagent light
sp|P14152|MDHC_MOUSE	222	256	G.E(-18.01)FITTVQQRGAAVIK(+42.01)ARKLSSAM(+15.99)SAAK(+100.02)AIADHIRD.I	96.9	30.25	3893.06	8.6	974.28	4	85.49	1	Pyro-glu from E; Acetylation (K); Oxidation (M)
sp|Q9QZM0|UBQL2_MOUSE	580	637	Q.A(+100.02)LTGGSPPQPPNPEVRFQQQLEQLNAMGFLNREANLQALIATGGDINAAIERLLGSQP.S	96.2	30.1	6250.19	-19.3	1563.52	4	69.67	1	Succinic anhydride labeling reagent light
sp|P04370|MBP_MOUSE	155	165	D.H(+104.04)ARHGFLPRHR.D	96.6	30.08	1486.8	-7.7	372.703	4	41.92	1	Succinic anhydride labeling reagent heavy (+4amu 4H2)
sp|P04370|MBP_MOUSE	149	167	A.T(+104.04)ASTM(+15.99)DHARHGFLPRHRDT.G	96.1	29.99	2325.1	-30.8	466.012	5	39.04	1	Oxidation (M); Succinic anhydride labeling reagent heavy (+4amu 4H2)
sp|P04370|MBP_MOUSE	150	168	T.A(+104.04)STM(+15.99)DHARHGFLPRHRDTG.I	96.6	29.98	2281.07	-12.9	571.268	4	45.19	1	Oxidation (M); Succinic anhydride labeling reagent heavy (+4amu 4H2)
sp|P62631|EF1A2_MOUSE	344	356	Q.V(+100.02)IILNHPGQISAG.Y	96.5	29.66	1417.76	-6.1	709.881	2	72.61	1	Succinic anhydride labeling reagent light
sp|Q9R0P9|UCHL1_MOUSE	50	62	L.L(+104.04)LLFPLTAQHENF.R	96.5	29.58	1645.87	-3.3	823.937	2	94.08	1	Succinic anhydride labeling reagent heavy (+4amu 4H2)
sp|P04370|MBP_MOUSE	148	166	L.A(+100.02)TASTM(+15.99)DHARHGFLPRHRD.T	96.5	29.52	2291.06	-12.9	573.765	4	46.85	1	Oxidation (M); Succinic anhydride labeling reagentlight
sp|O08553|DPYL2_MOUSE	555	567	T.TQRIVAPPGGRAN.I	96.5	29.51	1335.74	-12.2	446.248	3	45.54	0
sp|P99029|PRDX5_MOUSE	132	155	E.E(+100.02)WGRAHQAEGK(+100.02)VRLLADPTGAFGK(+100.02).A	93.5	29.19	2893.4	-4	965.47	3	72.6	3	Succinic anhydride labeling reagent light
tr|H3BJQ7|H3BJQ7_MOUSE	135	158	E.E(+100.02)WGRAHQAEGK(+100.02)VRLLADPTGAFGK(+100.02).A	93.5	29.19	2893.4	-4	965.47	3	72.6	3	Succinic anhydride labeling reagent light
sp|Q61171|PRDX2_MOUSE	131	149	F.I(+104.04)IDAK(+104.04)GVLRQITVNDLPVG.R	93.5	29.09	2228.25	-0.6	1115.13	2	91.99	2	Succinic anhydride labeling reagent heavy (+4amu 4H2)
sp|P04370|MBP_MOUSE	151	166	A.S(+104.04)TM(+15.99)DHARHGFLPRHRD.T	93.5	28.99	2051.96	-13.7	513.991	4	43.94	1	Oxidation (M); Succinic anhydride labeling reagent heavy (+4amu 4H2)
sp|P17751|TPIS_MOUSE	220	244	W.A(+104.04)IGTGK(+104.04)TATPQQAQEVHEK(+104.04)LRGWLK(+104.04).S	95.4	28.81	3162.65	-25.1	1055.2	3	55.06	4	Succinic anhydride labeling reagent heavy (+4amu 4H2)
tr|H7BXC3|H7BXC3_MOUSE	88	112	W.A(+104.04)IGTGK(+104.04)TATPQQAQEVHEK(+104.04)LRGWLK(+104.04).S	95.4	28.81	3162.65	-25.1	1055.2	3	55.06	4	Succinic anhydride labeling reagent heavy (+4amu 4H2)
sp|Q91VR2|ATPG_MOUSE	130	148	M.I(+104.04)VGVGEK(+104.04)IK(+104.04)GILYRTHSDQ.F	93.4	28.77	2424.29	-3.1	809.102	3	93.97	3	Succinic anhydride labeling reagent heavy (+4amu 4H2)
tr|A2AKU9|A2AKU9_MOUSE	130	148	M.I(+104.04)VGVGEK(+104.04)IK(+104.04)GILYRTHSDQ.F	93.4	28.77	2424.29	-3.1	809.102	3	93.97	3	Succinic anhydride labeling reagent heavy (+4amu 4H2)
tr|A2AKV1|A2AKV1_MOUSE	106	124	M.I(+104.04)VGVGEK(+104.04)IK(+104.04)GILYRTHSDQ.F	93.4	28.77	2424.29	-3.1	809.102	3	93.97	3	Succinic anhydride labeling reagent heavy (+4amu 4H2)
tr|A2AKV2|A2AKV2_MOUSE	106	124	M.I(+104.04)VGVGEK(+104.04)IK(+104.04)GILYRTHSDQ.F	93.4	28.77	2424.29	-3.1	809.102	3	93.97	3	Succinic anhydride labeling reagent heavy (+4amu 4H2)
tr|A2AKV3|A2AKV3_MOUSE	106	124	M.I(+104.04)VGVGEK(+104.04)IK(+104.04)GILYRTHSDQ.F	93.4	28.77	2424.29	-3.1	809.102	3	93.97	3	Succinic anhydride labeling reagent heavy (+4amu 4H2)
tr|Q8C2Q8|Q8C2Q8_MOUSE	106	124	M.I(+104.04)VGVGEK(+104.04)IK(+104.04)GILYRTHSDQ.F	93.4	28.77	2424.29	-3.1	809.102	3	93.97	3	Succinic anhydride labeling reagent heavy (+4amu 4H2)
sp|P05064|ALDOA_MOUSE	32	61	L.A(+100.02)ADESTGSIAK(+100.02)RLQSIGTENTEENRRFYRQ.L	93.3	28.61	3626.72	-9.1	907.679	4	67.11	2	Succinic anhydride labeling reagent light
tr|A6ZI44|A6ZI44_MOUSE	86	115	L.A(+100.02)ADESTGSIAK(+100.02)RLQSIGTENTEENRRFYRQ.L	93.3	28.61	3626.72	-9.1	907.679	4	67.11	2	Succinic anhydride labeling reagent light
sp|P04370|MBP_MOUSE	158	168	R.H(+100.02)GFLPRHRDTG.I	93.3	28.5	1391.67	-11.2	464.892	3	48.38	1	Succinic anhydride labeling reagent light
sp|Q8K0T0|RTN1_MOUSE	764	778	T.V(+104.04)VAK(+104.04)IQAK(+104.04)IPGAK(+104.04)RH.A	93.3	28.48	2031.17	-3.1	1016.59	2	77.84	4	Succinic anhydride labeling reagent heavy (+4amu 4H2)
tr|A3QM89|A3QM89_MOUSE	237	251	T.V(+104.04)VAK(+104.04)IQAK(+104.04)IPGAK(+104.04)RH.A	93.3	28.48	2031.17	-3.1	1016.59	2	77.84	4	Succinic anhydride labeling reagent heavy (+4amu 4H2)
tr|Q7M6W1|Q7M6W1_MOUSE	192	206	T.V(+104.04)VAK(+104.04)IQAK(+104.04)IPGAK(+104.04)RH.A	93.3	28.48	2031.17	-3.1	1016.59	2	77.84	4	Succinic anhydride labeling reagent heavy (+4amu 4H2)
sp|O35098|DPYL4_MOUSE	1	29	M(+42.01)(+15.99)SFQGKK(+104.04)SIPRITSDRLLIK(+104.04)GGK(+104.04)IVNDDQ.S	93.2	28.36	3613.91	-3	1205.64	3	74.01	3	Acetylation (N-term); Oxidation (M); Succinic anhydride labeling reagent heavy (+4amu 4H2)
tr|Q3TMU8|Q3TMU8_MOUSE	1	29	M(+42.01)(+15.99)SFQGKK(+104.04)SIPRITSDRLLIK(+104.04)GGK(+104.04)IVNDDQ.S	93.2	28.36	3613.91	-3	1205.64	3	74.01	3	Acetylation (N-term); Oxidation (M); Succinic anhydride labeling reagent heavy (+4amu 4H2)
sp|P05064|ALDOA_MOUSE	2	27	M.P(+100.02)HPYPALTPEQK(+100.02)K(+100.02)ELSDIAHRIVAPG.K	93.2	28.29	3163.58	-1.4	1055.53	3	79.6	3	Succinic anhydride labeling reagent light
tr|A6ZI44|A6ZI44_MOUSE	56	81	M.P(+100.02)HPYPALTPEQK(+100.02)K(+100.02)ELSDIAHRIVAPG.K	93.2	28.29	3163.58	-1.4	1055.53	3	79.6	3	Succinic anhydride labeling reagent light
sp|P05064|ALDOA_MOUSE	2	29	M.P(+104.04)HPYPALTPEQK(+104.04)K(+104.04)ELSDIAHRIVAPGK(+104.04)G.I	95.4	28.16	3464.82	-25.3	867.189	4	58.48	4	Succinic anhydride labeling reagent heavy (+4amu 4H2)
tr|A6ZI44|A6ZI44_MOUSE	56	83	M.P(+104.04)HPYPALTPEQK(+104.04)K(+104.04)ELSDIAHRIVAPGK(+104.04)G.I	95.4	28.16	3464.82	-25.3	867.189	4	58.48	4	Succinic anhydride labeling reagent heavy (+4amu 4H2)
sp|P04370|MBP_MOUSE	148	168	L.A(+104.04)TASTM(+15.99)DHARHGFLPRHRDTG.I	93.1	28.04	2453.16	-14.2	614.288	4	46.59	1	Oxidation (M); Succinic anhydride labeling reagent heavy (+4amu 4H2)
sp|P16858|G3P_MOUSE	231	240	A.F(+100.02)RVPTPNVSV.V	95.3	27.98	1214.63	-27.2	608.306	2	53.48	1	Succinic anhydride labeling reagent light
sp|Q64467|G3PT_MOUSE	337	346	A.F(+100.02)RVPTPNVSV.V	95.3	27.98	1214.63	-27.2	608.306	2	53.48	1	Succinic anhydride labeling reagent light
tr|S4R1W1|S4R1W1_MOUSE	231	240	A.F(+100.02)RVPTPNVSV.V	95.3	27.98	1214.63	-27.2	608.306	2	53.48	1	Succinic anhydride labeling reagent light
tr|S4R257|S4R257_MOUSE	188	197	A.F(+100.02)RVPTPNVSV.V	95.3	27.98	1214.63	-27.2	608.306	2	53.48	1	Succinic anhydride labeling reagent light
tr|S4R2G5|S4R2G5_MOUSE	337	346	A.F(+100.02)RVPTPNVSV.V	95.3	27.98	1214.63	-27.2	608.306	2	53.48	1	Succinic anhydride labeling reagent light
sp|P04370|MBP_MOUSE	154	168	M.D(+104.04)HARHGFLPRHRDTG.I	92.9	27.65	1874.92	-12.8	469.731	4	43.28	1	Succinic anhydride labeling reagent heavy (+4amu 4H2)
sp|P04370|MBP_MOUSE	149	168	A.T(+104.04)ASTM(+15.99)DHARHGFLPRHRDTG.I	95.2	27.61	2382.12	-29.1	596.519	4	38.99	1	Oxidation (M); Succinic anhydride labeling reagent heavy (+4amu 4H2)
sp|P99029|PRDX5_MOUSE	129	155	F.V(+104.04)IEEWGRAHQAEGK(+104.04)VRLLADPTGAFGK(+104.04).A	92.9	27.6	3246.67	-2.9	1083.23	3	78.62	3	Succinic anhydride labeling reagent heavy (+4amu 4H2)
tr|H3BJQ7|H3BJQ7_MOUSE	132	158	F.V(+104.04)IEEWGRAHQAEGK(+104.04)VRLLADPTGAFGK(+104.04).A	92.9	27.6	3246.67	-2.9	1083.23	3	78.62	3	Succinic anhydride labeling reagent heavy (+4amu 4H2)
sp|P17742|PPIA_MOUSE	130	145	F.G(+100.02)KVKEGM(+15.99)NIVEAMERF.G	92.9	27.55	1952.93	-7.3	977.467	2	106.41	1	Succinic anhydride labeling reagent light; Oxidation (M)
sp|P17426|AP2A1_MOUSE	664	681	L.R(+100.02)AAPPPAAPPAPVGGNLL(-.98).V	92.9	27.47	1763.97	-20.1	882.974	2	68.58	1	Succinic anhydride labeling reagent light; Amidation
tr|F6TPX8|F6TPX8_MOUSE	8	25	L.R(+100.02)AAPPPAAPPAPVGGNLL(-.98).V	92.9	27.47	1763.97	-20.1	882.974	2	68.58	1	Succinic anhydride labeling reagent light; Amidation
sp|P04370|MBP_MOUSE	148	166	L.A(+104.04)TASTM(+15.99)DHARHGFLPRHRD.T	91.9	27.34	2295.09	-13.7	574.771	4	46.87	1	Oxidation (M); Succinic anhydride labeling reagent heavy (+4amu 4H2)
sp|P08249|MDHM_MOUSE	224	251	L.A(+100.02)TLTGRIQEAGTEVVK(+100.02)AK(+100.02)AGAGSATLSM(+15.99).A	91.6	26.9	3033.48	-4.7	1012.16	3	57.52	3	Succinic anhydride labeling reagent light; Oxidation (M)
sp|P08249|MDHM_MOUSE	139	165	C.I(+104.04)IANPVNSTIPITAEVFK(+104.04)K(+104.04)HGVYNPNK(+104.04).I	91.4	26.8	3379.79	-24.3	1127.58	3	61.56	4	Succinic anhydride labeling reagent heavy (+4amu 4H2)
sp|Q03265|ATPA_MOUSE	59	89	R.I(+100.02)LGADTSVDLEETGRVLSIGDGIARVHGLRN.V	91.5	26.8	3332.73	-2.4	834.188	4	80.29	1	Succinic anhydride labeling reagent light
tr|D3Z6F5|D3Z6F5_MOUSE	9	39	R.I(+100.02)LGADTSVDLEETGRVLSIGDGIARVHGLRN.V	91.5	26.8	3332.73	-2.4	834.188	4	80.29	1	Succinic anhydride labeling reagent light
sp|P04370|MBP_MOUSE	152	168	S.TM(+15.99)DHARHGFLPRHRDTG.I	91.5	26.79	2018.96	-13.3	505.741	4	40.67	0	Oxidation (M)
sp|P04370|MBP_MOUSE	152	168	S.T(+104.04)M(+15.99)DHARHGFLPRHRDTG.I	91.3	26.59	2123	-14.2	531.75	4	44.27	1	Oxidation (M); Succinic anhydride labeling reagent heavy (+4amu 4H2)
sp|Q03265|ATPA_MOUSE	70	89	E.E(+100.02)TGRVLSIGDGIARVHGLRN.V	91.3	26.59	2219.18	-9.6	555.796	4	66.05	1	Succinic anhydride labeling reagent light
tr|D3Z6F5|D3Z6F5_MOUSE	20	39	E.E(+100.02)TGRVLSIGDGIARVHGLRN.V	91.3	26.59	2219.18	-9.6	555.796	4	66.05	1	Succinic anhydride labeling reagent light
sp|P04370|MBP_MOUSE	153	166	T.M(+15.99)DHARHGFLPRHRD.T	91.3	26.58	1759.84	-11.8	440.963	4	40.22	0	Oxidation (M)
sp|P05213|TBA1B_MOUSE	259	269	N.L(+104.04)VPYPRIHFPL.A	91.3	26.51	1454.82	-3.1	728.416	2	80.64	1	Succinic anhydride labeling reagent heavy (+4amu 4H2)
sp|P05214|TBA3_MOUSE	259	269	N.L(+104.04)VPYPRIHFPL.A	91.3	26.51	1454.82	-3.1	728.416	2	80.64	1	Succinic anhydride labeling reagent heavy (+4amu 4H2)
sp|P68368|TBA4A_MOUSE	259	269	N.L(+104.04)VPYPRIHFPL.A	91.3	26.51	1454.82	-3.1	728.416	2	80.64	1	Succinic anhydride labeling reagent heavy (+4amu 4H2)
sp|P68369|TBA1A_MOUSE	259	269	N.L(+104.04)VPYPRIHFPL.A	91.3	26.51	1454.82	-3.1	728.416	2	80.64	1	Succinic anhydride labeling reagent heavy (+4amu 4H2)
sp|P68373|TBA1C_MOUSE	259	269	N.L(+104.04)VPYPRIHFPL.A	91.3	26.51	1454.82	-3.1	728.416	2	80.64	1	Succinic anhydride labeling reagent heavy (+4amu 4H2)
sp|Q64445|COX8A_MOUSE	52	59	C.L(+100.02)LPAGWVL.S	35.7	26.46	967.538	-13	968.533	1	74.85	1	Succinic anhydride labeling reagent light
sp|Q9D3D9|ATPD_MOUSE	71	92	L.A(+100.02)SHVPTLQVLRPGLVVVHTEDG.T	88.7	26.44	2423.28	-26.8	808.746	3	52.09	1	Succinic anhydride labeling reagent light
tr|D3Z7S4|D3Z7S4_MOUSE	71	92	L.A(+100.02)SHVPTLQVLRPGLVVVHTEDG.T	88.7	26.44	2423.28	-26.8	808.746	3	52.09	1	Succinic anhydride labeling reagent light
sp|Q64433|CH10_MOUSE	2	10	M.A(+42.01)GQAFRK(+100.02)FL.P	88.6	26.41	1178.61	-26.4	590.296	2	58.01	1	Acetylation (N-term); Succinic anhydride labeling reagent light
sp|P04370|MBP_MOUSE	150	168	T.ASTMDHARHGFLPRHRDTG.I	91.1	26.34	2161.03	-14.4	541.258	4	43.98	0
sp|P04370|MBP_MOUSE	154	167	M.DHARHGFLPRHRDT.G	91.1	26.32	1713.86	-12.1	429.466	4	40.51	0
sp|P63085|MK01_MOUSE	2	17	M.A(+42.01)AAAAAGPEMVRGQVF.D	91.1	26.31	1586.79	-8.4	794.394	2	69.57	0	Acetylation (N-term)
sp|P51881|ADT2_MOUSE	9	31	F.A(+104.04)K(+104.04)DFLAGGVAAAISK(+104.04)TAVAPIER.V	87.2	25.91	2567.39	-23.6	856.783	3	66.07	3	Succinic anhydride labeling reagent heavy (+4amu 4H2)
sp|P04370|MBP_MOUSE	154	164	M.D(+104.04)HARHGFLPRH.R	90.3	25.84	1445.72	-12.1	482.909	3	46.45	1	Succinic anhydride labeling reagent heavy (+4amu 4H2)
sp|P04370|MBP_MOUSE	158	168	R.HGFLPRHRDTG.I	90.3	25.84	1291.65	-10.2	431.554	3	41.68	0
sp|O08553|DPYL2_MOUSE	541	567	S.L(+104.04)SGAQIDDNIPRRTTQRIVAPPGGRAN.I	90.1	25.71	2976.58	-11	745.144	4	59.96	1	Succinic anhydride labeling reagent heavy (+4amu 4H2)
sp|P97427|DPYL1_MOUSE	540	563	F.S(+104.04)LSGAQIDDNNPRRTGHRIVAPPG.G	90	25.67	2631.34	-15.9	658.832	4	54.08	1	Succinic anhydride labeling reagent heavy (+4amu 4H2)
tr|Q6P1J1|Q6P1J1_MOUSE	654	677	F.S(+104.04)LSGAQIDDNNPRRTGHRIVAPPG.G	90	25.67	2631.34	-15.9	658.832	4	54.08	1	Succinic anhydride labeling reagent heavy (+4amu 4H2)
sp|P04370|MBP_MOUSE	152	168	S.T(+100.02)M(+15.99)DHARHGFLPRHRDTG.I	86.9	25.54	2118.98	-27.9	530.737	4	38.48	1	Oxidation (M)
sp|Q7TMF3|NDUAC_MOUSE	4	22	L.V(+100.02)EVLK(+100.02)RGVQQVTGHGGLRG.L	89.8	25.5	2189.16	-4	730.723	3	78.34	2	Succinic anhydride labeling reagent light
sp|P04370|MBP_MOUSE	154	167	M.D(+104.04)HARHGFLPRHRDT.G	89.8	25.49	1817.9	-11.4	455.476	4	43.7	1	Succinic anhydride labeling reagent heavy (+4amu 4H2)
sp|P63044|VAMP2_MOUSE	2	34	M.S(+42.01)ATAATVPPAAPAGEGGPPAPPPNLTSNRRLQQ.T	88.4	25.4	3232.66	-9.8	1078.55	3	59.61	0	Acetylation (N-term)
tr|B0QZN5|B0QZN5_MOUSE	2	34	M.S(+42.01)ATAATVPPAAPAGEGGPPAPPPNLTSNRRLQQ.T	88.4	25.4	3232.66	-9.8	1078.55	3	59.61	0	Acetylation (N-term)
sp|P04370|MBP_MOUSE	148	168	L.A(+104.04)TASTMDHARHGFLPRHRDTG.I	88	25.27	2437.16	-12.5	610.29	4	51.51	1	Succinic anhydride labeling reagent heavy (+4amu 4H2)
sp|P08249|MDHM_MOUSE	224	248	L.A(+104.04)TLTGRIQEAGTEVVK(+104.04)AK(+104.04)AGAGSAT.L	86.7	25.25	2698.41	-27	900.451	3	56.16	3	Succinic anhydride labeling reagent heavy (+4amu 4H2)
sp|P43006|EAA2_MOUSE	355	370	W.I(+100.02)TALGTASSAGTLPVT.F	87.7	25.18	1558.81	-5.2	780.408	2	77.92	1	Succinic anhydride labeling reagent light
tr|A2APL5|A2APL5_MOUSE	355	370	W.I(+100.02)TALGTASSAGTLPVT.F	87.7	25.18	1558.81	-5.2	780.408	2	77.92	1	Succinic anhydride labeling reagent light
sp|P04370|MBP_MOUSE	158	165	R.H(+104.04)GFLPRHR.D	87.4	25.09	1122.6	-7.5	375.204	3	49.09	1	Succinic anhydride labeling reagent heavy (+4amu 4H2)
sp|P04370|MBP_MOUSE	157	168	A.R(+104.04)HGFLPRHRDTG.I	87.1	24.88	1551.8	-9.2	388.953	4	44.78	1	Succinic anhydride labeling reagent heavy (+4amu 4H2)
sp|P08249|MDHM_MOUSE	139	167	C.I(+104.04)IANPVNSTIPITAEVFK(+104.04)K(+104.04)HGVYNPNK(+104.04)IF.G	86	24.53	3639.94	-0.9	1214.32	3	89.27	4	Succinic anhydride labeling reagent heavy (+4amu 4H2)
sp|P97807|FUMH_MOUSE	270	309	L.A(+104.04)AGGTAVGTGLNTRIGFAEK(+104.04)VAAK(+104.04)VAALTGLPFVTAPNK(+104.04)F.E	86	24.53	4302.31	-14	1076.57	4	104.43	4	Succinic anhydride labeling reagent heavy (+4amu 4H2)
sp|P17742|PPIA_MOUSE	115	145	I.C(+104.04)TAK(+104.04)TEWLDGKHVVFGK(+42.01)VK(+104.04)EGMNIVEAMERF.G	76.3	24.06	3905.91	-13.8	977.471	4	106.38	3	Succinic anhydride labeling reagent heavy (+4amu 4H2); Acetylation (K)
sp|Q99KI0|ACON_MOUSE	766	774	W.F(+104.04)RAGSALNR.M	76.2	24.06	1094.58	-12.5	548.289	2	56.2	1	Succinic anhydride labeling reagent heavy (+4amu 4H2)
sp|Q64433|CH10_MOUSE	2	13	M.A(+42.01)GQAFRK(+104.04)FLPLF.D	78.8	23.63	1539.84	-24	770.908	2	67.74	1	Acetylation (N-term); Succinic anhydride labeling reagent heavy (+4amu 4H2)
sp|P04370|MBP_MOUSE	151	167	A.S(+104.04)TMDHARHGFLPRHRDT.G	75.9	23.62	2137.02	-12.8	535.255	4	48.73	1	Succinic anhydride labeling reagent heavy (+4amu 4H2)
sp|P04370|MBP_MOUSE	153	167	T.M(+15.99)DHARHGFLPRHRDT.G	75.9	23.6	1860.89	-13.1	466.224	4	40.35	0	Oxidation (M)
sp|Q9DB20|ATPO_MOUSE	75	108	V.SLAVLNPYIKRTVK(+100.02)VK(+100.02)SLNDITK(+100.02)REK(+100.02)FSPLTANL.M	78.4	23.31	4256.29	-43.8	1065.03	4	62.25	4	Succinic anhydride labeling reagent light
sp|O54983|CRYM_MOUSE	35	57	F.S(+100.02)K(+100.02)GPDGGVMQPVRTVVPVAK(+100.02)HRG.F	75.7	23.25	2671.34	-13.3	891.442	3	61.77	3	Succinic anhydride labeling reagent light
sp|Q9DBJ1|PGAM1_MOUSE	208	218	E.L(+100.02)NLPTGIPIVY.E	31.3	23.17	1298.71	-11	1299.71	1	67.3	1	Succinic anhydride labeling reagent light
sp|P04370|MBP_MOUSE	152	168	S.TMDHARHGFLPRHRDTG.I	75.6	23.14	2002.97	-13.3	501.742	4	42.32	0
sp|P04370|MBP_MOUSE	152	168	S.T(+100.02)MDHARHGFLPRHRDTG.I	77.9	22.86	2102.98	-29.5	526.737	4	40.21	1	Succinic anhydride labeling reagent light
sp|Q9DB20|ATPO_MOUSE	75	106	V.SLAVLNPYIKRTVK(+100.02)VK(+100.02)SLNDITK(+100.02)REK(+100.02)FSPLTA.N	75.4	22.85	4029.17	-21.7	1344.03	3	83.06	4	Succinic anhydride labeling reagent light
sp|P01942|HBA_MOUSE	35	47	F.A(+100.02)SFPTTK(+100.02)TYFPHF.D	77.8	22.79	1742.78	-20.9	872.38	2	59.03	2	Succinic anhydride labeling reagent light
tr|Q91VB8|Q91VB8_MOUSE	35	47	F.A(+100.02)SFPTTK(+100.02)TYFPHF.D	77.8	22.79	1742.78	-20.9	872.38	2	59.03	2	Succinic anhydride labeling reagent light
sp|P01942|HBA_MOUSE	46	87	P.H(+100.02)FDVSHGSAQVKGHGK(+100.02)KVADALASAAGHLDDLPGALSALSDL.H	77.7	22.75	4362.15	-32.4	1091.51	4	64.12	2	Succinic anhydride labeling reagent light
sp|P14152|MDHC_MOUSE	222	256	G.E(-18.01)FITTVQQRGAAVIK(+100.02)ARK(+42.01)LSSAM(+15.99)SAAKAIADHIRD.I	75.3	22.74	3893.06	7.7	974.279	4	85.34	1	Pyro-glu from E; Acetylation (K); Oxidation (M); succinic anhydride labeling reagent light
sp|P01942|HBA_MOUSE	46	87	P.HFDVSHGSAQVK(+100.02)GHGK(+100.02)KVADALASAAGHLDDLPGALSALSDL.H	77.4	22.51	4362.15	-32.8	1091.51	4	64.06	2	Succinic anhydride labeling reagent light
sp|Q9D3D9|ATPD_MOUSE	71	88	L.A(+104.04)SHVPTLQVLRPGLVVVH.T	75	22.35	2025.17	-9.6	676.057	3	70.75	1	Succinic anhydride labeling reagent heavy (+4amu 4H2)
tr|D3Z7S4|D3Z7S4_MOUSE	71	88	L.A(+104.04)SHVPTLQVLRPGLVVVH.T	75	22.35	2025.17	-9.6	676.057	3	70.75	1	Succinic anhydride labeling reagent heavy (+4amu 4H2)
sp|P05064|ALDOA_MOUSE	258	267	L.R(+100.02)RTVPPAVTG.V	74.9	22.26	1152.63	-13.5	577.312	2	48.85	1	Succinic anhydride labeling reagent light
tr|A6ZI44|A6ZI44_MOUSE	312	321	L.R(+100.02)RTVPPAVTG.V	74.9	22.26	1152.63	-13.5	577.312	2	48.85	1	Succinic anhydride labeling reagent light
tr|A8DUK4|A8DUK4_MOUSE	111	126	M.I(+104.04)VIVLGHHLGK(+104.04)DFTPA.A	74.9	22.24	1924.05	-1.7	963.033	2	86.12	2	Succinic anhydride labeling reagent heavy (+4amu 4H2)
sp|Q9DB20|ATPO_MOUSE	75	106	V.S(+100.02)LAVLNPYIKRTVKVK(+100.02)SLNDITK(+100.02)REK(+100.02)FSPLTA.N	74.9	22.15	4029.17	-21.8	1344.03	3	83.14	4	Succinic anhydride labeling reagent light
sp|P04370|MBP_MOUSE	151	168	A.S(+104.04)TMDHARHGFLPRHRDTG.I	74.8	22.07	2194.04	-13.3	549.51	4	48.59	1	Succinic anhydride labeling reagent heavy (+4amu 4H2)
sp|Q8R317|UBQL1_MOUSE	524	581	L.Q(+42.01)ALAGVNPQLQSPEVRFQQQLEQLSAM(+15.99)GFLNREANLQALIATGGDINAAIERLLGSQP.S	74.7	21.94	6271.24	-7.7	1568.81	4	95.8	0	Acetylation (N-term); Oxidation (M)
sp|Q64433|CH10_MOUSE	2	13	M.A(+42.01)GQAFRK(+100.02)FLPLF.D	29.1	21.48	1535.81	-12.9	768.904	2	68.1	1	Acetylation (N-term); Succinic anhydride labeling reagent light
sp|P60710|ACTB_MOUSE	29	42	R.A(+100.02)VFPSIVGRPRHQG.V	73.6	21.27	1619.85	-10.3	540.953	3	62.8	1	Succinic anhydride labeling reagent light
sp|P68033|ACTC_MOUSE	31	44	R.A(+100.02)VFPSIVGRPRHQG.V	73.6	21.27	1619.85	-10.3	540.953	3	62.8	1	Succinic anhydride labeling reagent light
sp|P68134|ACTS_MOUSE	31	44	R.A(+100.02)VFPSIVGRPRHQG.V	73.6	21.27	1619.85	-10.3	540.953	3	62.8	1	Succinic anhydride labeling reagent light
tr|E9Q5F4|E9Q5F4_MOUSE	29	42	R.A(+100.02)VFPSIVGRPRHQG.V	73.6	21.27	1619.85	-10.3	540.953	3	62.8	1	Succinic anhydride labeling reagent light
sp|P04370|MBP_MOUSE	151	168	A.S(+104.04)TM(+15.99)DHARHGFLPRHRDTG.I	73.6	21.26	2210.03	-14.8	553.508	4	44.19	1	Oxidation (M); Succinic anhydride labeling reagent heavy (+4amu 4H2)
sp|P04370|MBP_MOUSE	153	167	T.MDHARHGFLPRHRDT.G	73.4	21.15	1844.9	-12.1	462.226	4	41.33	0
sp|P68033|ACTC_MOUSE	55	91	S.Y(+104.04)VGDEAQSK(+104.04)RGILTLK(+104.04)YPIEHGIITNWDDMEK(+104.04)IWHHT.F	59.6	21.11	4809.36	-23	1203.32	4	65.3	4	Succinic anhydride labeling reagent heavy (+4amu 4H2)
sp|P68134|ACTS_MOUSE	55	91	S.Y(+104.04)VGDEAQSK(+104.04)RGILTLK(+104.04)YPIEHGIITNWDDMEK(+104.04)IWHHT.F	59.6	21.11	4809.36	-23	1203.32	4	65.3	4	Succinic anhydride labeling reagent heavy (+4amu 4H2)
sp|P05064|ALDOA_MOUSE	32	61	L.A(+104.04)ADESTGSIAK(+104.04)RLQSIGTENTEENRRFYRQ.L	73.2	21.09	3634.77	-9.4	909.691	4	67.1	2	Succinic anhydride labeling reagent heavy (+4amu 4H2)
tr|A6ZI44|A6ZI44_MOUSE	86	115	L.A(+104.04)ADESTGSIAK(+104.04)RLQSIGTENTEENRRFYRQ.L	73.2	21.09	3634.77	-9.4	909.691	4	67.1	2	Succinic anhydride labeling reagent heavy (+4amu 4H2)
sp|Q9D6R2|IDH3A_MOUSE	154	181	Y.S(+100.02)GIEHVIVDGVVQSIK(+100.02)LITEEASK(+100.02)RIAE.F	58.6	20.95	3319.7	-26.9	1107.55	3	78.63	3	Succinic anhydride labeling reagent light
sp|P04370|MBP_MOUSE	153	167	T.M(+42.01)(+15.99)DHARHGFLPRHRDT.G	63.1	20.87	1902.9	-11.6	476.727	4	43.16	0	Acetylation (N-term); Oxidation (M)
sp|P08249|MDHM_MOUSE	44	55	L.L(+100.02)K(+100.02)NSPLVSRLTL.Y	61.5	20.72	1539.85	-2.7	770.931	2	80.99	2	Succinic anhydride labeling reagent light
sp|P04370|MBP_MOUSE	152	165	S.T(+104.04)MDHARHGFLPRHR.D	60.3	20.61	1833.91	-12.2	459.479	4	48.4	1	Succinic anhydride labeling reagent heavy (+4amu 4H2)
sp|Q64433|CH10_MOUSE	2	14	M.A(+42.01)GQAFRK(+100.02)FLPLFD.R	56.2	20.59	1650.84	-23	826.409	2	66.81	1	Acetylation (N-term); Succinic anhydride labeling reagent light
sp|P14152|MDHC_MOUSE	222	256	G.E(-18.01)FITTVQQRGAAVIKARK(+42.01)LSSAMSAAK(+100.02)AIADHIRD.I	56.2	20.58	3877.06	-38.3	970.236	4	62.6	1	Pyro-glu from E; Acetylation (K); succinic anhydride labeling reagent light
sp|Q9DB20|ATPO_MOUSE	24	33	P.FAK(+100.02)LVRPPVQ.V	59.9	20.58	1253.71	-13.1	627.856	2	61.25	1	Succinic anhydride labeling reagent light
sp|P01942|HBA_MOUSE	46	87	P.H(+100.02)FDVSHGSAQVK(+100.02)GHGKKVADALASAAGHLDDLPGALSALSDL.H	21.6	20.38	4362.15	-32.2	1091.51	4	64.2	2	Succinic anhydride labeling reagent light
sp|P06745|G6PI_MOUSE	406	425	D.F(+104.04)LIPVQTQHPIRK(+104.04)GLHHK(+104.04)IL.L	21	20.17	2686.53	-28	672.622	4	52.92	3	Succinic anhydride labeling reagent heavy (+4amu 4H2)
sp|P43006|EAA2_MOUSE	172	180	L.I(+100.02)RNLFPENL.V	51.2	19.98	1214.63	-1.8	608.321	2	82.17	1	Succinic anhydride labeling reagent light
tr|A2APL5|A2APL5_MOUSE	172	180	L.I(+100.02)RNLFPENL.V	51.2	19.98	1214.63	-1.8	608.321	2	82.17	1	Succinic anhydride labeling reagent light
sp|P62631|EF1A2_MOUSE	258	275	G.G(+104.04)IGTVPVGRVETGILRPG.M	51	19.87	1881.06	-9.1	628.022	3	68.92	1	Succinic anhydride labeling reagent heavy (+4amu 4H2)
sp|P14152|MDHC_MOUSE	287	307	Y.S(+42.01)FPVVIK(+42.01)NKTWK(+104.04)FVEGLPIND.F	19.9	19.82	2618.39	-65.9	1310.12	2	74.84	1	Acetylation (N-term); Acetylation (K); Succinic anhydride labeling reagent heavy (+4amu 4H2)
Identical peptides with multiple protein hits are listed multiple times;
The PEAKS peptide score (-10lgP) is calculated for every peptide-spectrum match reported by PEAKS search engine. The score is derived from the p-value that indicates the statistical significance of the peptide-spectrum match. A peptide may be matched to many spectra,
resulting in multiple PSMs. In that case, the peptide's score is calculated as the maximum of all the PSMs. For details of the scoring algorithm, please refer to the publication, "PEAKS DB: De Novo sequencing assisted database search for sensitive and accurate peptide identification" Mol Cell Proteomics. 2011 Dec 20.
A score threshold set at 20 is a good choice to start with as its equivalent p-value will be 0.01.
